# Dopamine modulates visual threat processing in the superior colliculus via D2 receptors

**Authors:** Quentin Montardy<sup>1,6</sup>, Zheng Zhou<sup>1,4,6</sup>, Lei Li<sup>1,6</sup>, Qingning Yang<sup>1</sup>, Zhuogui Lei<sup>1,3</sup>, Xiaolong Feng<sup>1</sup>, Shanping Chen<sup>1,2</sup>, Qianqian Shi<sup>1</sup>, Huiqi Zhang<sup>1</sup>, Shuran Chen<sup>1,2</sup>, Zhijian Zhang<sup>5</sup>, Binghao Zhao<sup>1,2</sup>, Fuqiang Xu<sup>1,2</sup>, Zhonghua Lu<sup>1,2</sup> & Liping Wang<sup>1,2,\*</sup>

## **Affiliations:**

<sup>1</sup> Shenzhen Key Lab of Neuropsychiatric Modulation and Collaborative Innovation Center for Brain Science, Guangdong Provincial Key Laboratory of Brain Connectome and Behavior, CAS Center for Excellence in Brain Science and Intelligence Technology, the Brain Cognition and Brain Disease Institute (BCBDI), Shenzhen Institutes of Advanced Technology, Chinese Academy of Sciences, Shenzhen 518055, China; Shenzhen-Hong Kong Institute of Brain Science-Shenzhen Fundamental Research Institutions

<sup>2</sup> University of Chinese Academy of Sciences, Beijing 100049, China

<sup>3</sup> Department of Biomedical Sciences, City University of Hong Kong, Tat Chee Avenue, Kowloon, Hong Kong, SAR 999077, China

<sup>4</sup> McGovern Institute for Brain Research, Department of Brain and Cognitive Sciences, Massachusetts Institute of Technology, Cambridge, Massachusetts 02139, USA

<sup>5</sup> Center for Brain Science, Key Laboratory of Magnetic Resonance in Biological Systems and State Key Laboratory of Magnetic Resonance and Atomic and Molecular Physics, Wuhan Institute of Physics and Mathematics, CAS, Center for Excellence in Brain Science and Intelligence Technology, Chinese Academy of Sciences, Wuhan 430071, China

<sup>6</sup> These authors contributed equally to this work

\*Correspondence to:

Liping Wang, 1068 Xueyuan Avenue, Shenzhen University Town, Shenzhen, P.R. China; Email:

lp.wang@siat.ac.cn.

## **Abstract**

Dopamine (DA) system is intriguing in the aspect that distinct, typically opposing physiological functions are mediated by D1 dopamine receptors (Drd1) and D2 dopamine receptors (Drd2). Both Drd1+ and Drd2+ neurons were identified in superior colliculus (SC), a visuomotor integration center known for its role in defensive behaviors to visual threats. We hypothesized that Drd1+ and Drd2+ neurons in the SC may play a role in promoting instinctive defensive responses.

Optogenetic activation of Drd2+ neurons, but not Drd1+ neurons, in the SC triggered strong defensive behaviors. Chemogenetic inhibition of SC Drd2+ neurons decreased looming-induced defensive behavior, suggesting involvement of SC Drd2+ neurons in defensive responses. To

38 further confirm this functional role of Drd2 receptors, pretreatment with the Drd2+ agonist  
39 quinpirole in the SC impaired looming-evoked defensive responses, suggesting an essential role of  
40 Drd2 receptors in the regulation of innate defensive behavior. Inputs and outputs of SC Drd2+  
41 neurons were investigated using viral tracing: SC Drd2+ neurons mainly receive moderate inputs  
42 from the Locus Coeruleus (LC), whilst we did not find any incoming projections from other  
43 dopaminergic structures. Our results suggest a sophisticated regulatory role of DA and its receptor  
44 system in innate defensive behavior.

45  
46 **Keywords:** Superior colliculus; Drd2 receptor; innate fear; looming; defensive responses.

## 47 48 **Introduction**

49 Defensive behaviors are essential for survival, and requires detection and optimal behavioral  
50 selection at the sensorimotor level. Dopamine (DA) is a neurotransmitter synthesized in a limited  
51 set of brain structures, including the zona incerta (ZI), the ventral tegmental area (VTA) and the  
52 locus coeruleus (LC) (Björklund and Dunnett, 2007). It is involved in the learning and prediction  
53 of aversive events (Cohen et al., 2012; de Jong et al., 2019; Matsumoto et al., 2016), in  
54 sensorimotor control (Barrios et al., 2020; Frau et al., 2016; Pérez-Fernández et al., 2017) and in  
55 action selection (Howard et al., 2017; Kardamakis et al., 2015). There is growing evidence which  
56 indicate DA's involvement in defensive behaviors (Barbano et al., 2020; Luo et al., 2018), notably  
57 that there is a high correlation between signal saliency and uncertainty when expecting an incoming  
58 aversive stimulation (Fiorillo, 2003; Jo et al., 2018). Extending this idea, dopamine is thought to  
59 have a dynamic effect on action and behavior selection at the earliest levels of sensory integration  
60 (Essig and Felsen, 2016; Hoyt et al., 2019; Kardamakis et al., 2015). The superior colliculus (SC),  
61 a subcortical structure receiving direct retinal afferents (Basso and May, 2017; Sparks, 1986), is  
62 known for its role in early sensorimotor integration (Ito and Feldheim, 2018). The SC is also  
63 thought to detect stereotypical salient visual information, such as snakes (Almeida et al., 2015),  
64 crawling in primates (Almeida et al., 2015; Isbell, 2011; Le et al., 2016; Maior et al., 2011), and  
65 collision or airborne predators in mice (Yilmaz and Meister, 2013), before relaying the information  
66 over a few synapses to core emotional centers such as the amygdala (Shang et al., 2015; Wei et al.,  
67 2015; Zhou et al., 2019). Thus, in recent years, several pathways originating from the SC have been  
68 identified, revealing an SC-Pulvinar-Amygdala pathway controlling defensive behaviors (Wei et  
69 al., 2015), and an SC-VTA-Amygdala pathway controlling flight behaviors (Zhou et al., 2019).  
70 Additionally, SC dysfunction in the early detection of visual threats is thought to negatively  
71 contribute to emotional and psychiatric disorders, in particular to Post Traumatic Stress Disorder  
72 (PTSD) (Lanius et al., 2017; Nicholson et al., 2017; Rabellino et al., 2016).  
73 Interestingly, expression of dopaminergic receptors in the SC have been reported in many species  
74 including lamprey (Pérez-Fernández et al., 2014), rodents (Bolton et al., 2015; Mengod et al.,

75 1992), non-human primates (Ciliax et al., 2000) and humans (Hurd et al., 2001; Mengod et al.,  
76 1992). In mice, SC DA receptors are mainly Drd1 and Drd2 (Bolton et al., 2015), but their upstream  
77 targets remain elusive, and their function largely unknown. We hypothesized that SC neurons  
78 expressing dopaminergic receptors may be involved in defensive behaviors in response to visual  
79 threats.

80

## 81 **Results**

### 82 **Optogenetic activation of Drd2+ neurons in the SC, but not D1R, induces immediate flight** 83 **behavior**

84 To determine whether Drd1+ and Drd2+ SC neurons are involved in the control of defensive-like  
85 behaviors, we used an optogenetic strategy. First, we unilaterally injected the Cre-dependent  
86 adeno-associated virus AAV-DIO-ChR2-mCherry into the SC of Drd1-cre and Drd2-cre mice  
87 expressing Cre recombinase, selectively targeting SC neurons expressing dopamine receptors D1  
88 or D2. Following virus injection, an optical fiber was placed above the SC (Fig. 1.A, up). Analysis  
89 of virus expression revealed that Drd2+ neurons were mostly localized in the intermediate SC  
90 layers (Fig. 1.B), whilst Drd1+ neurons were mainly found in the superficial SC layers (Fig. 1.C),  
91 confirming that these two categories of SC neurons are mainly segregated by different layers. To  
92 understand the function of each type in the context of defensive behaviors, mice were placed in an  
93 open field with a nest as a hiding place. They were allowed to explore the apparatus for 3 min (Fig.  
94 1.A, down) during a pre-stimulation period in which both D2-cre and D1-cre animals showed  
95 typical exploratory behavior (Fig. 1.D, left). Optogenetic stimulation was then delivered (2.5 s, 20  
96 Hz), during which time D1-cre mice maintained normal activity yet D2-cre mice immediately fled  
97 to their nest before freezing inside for at least 30 s post-stimulation, (Fig. 1.D, supplementary video  
98 1-2), an effect observed in every individual in the D2-cre group. Consistent with this, only the  
99 D2::ChR2 group rapidly increased speed immediately following stimulation (Fig. 1.E). On  
100 average, when all groups were compared, only the D2::ChR2 mice had flight-to-nest behavior  
101 (latency: D1::ChR2:  $22.97 \pm 6.8$  s; D2::ChR2:  $0.59 \pm 0.12$  s; D2::mCherry  $22.77 \pm 3.92$   
102 s; \*\*P=0.0052, \*\*P=0.0109), shown by the latency to reach the nest after stimulation (Fig. 1.F). In  
103 addition, the average time spent in the nest after stimulation was similarly low for D1-cre and  
104 control D2-mCherry (D1::ChR2:  $33.81 \pm 10.31$  %; D2::mCherry  $27.89 \pm 2.92$  %; \*\*\*\*P<0.0001),  
105 and was significantly higher for D2:: ChR2 mice (D2::ChR2:  $99.01 \pm 0.12$  %; \*\*\*\*P<0.0001).  
106 These data suggest that Drd2+, but not Drd1+, SC neurons can induce defensive behaviors.  
107 Supporting this idea, SC Drd2+ neuronal projections (Sup. Fig. 1.A-B) encompass structures such  
108 as the lateral pulvinar, the ventral tegmental area, the parabrachial nucleus, and the  
109 periaqueductal gray. In summary, these results indicate the Drd2+ neurons are sufficient to trigger  
110 defensive behaviors.

111

112

113 **Repeated activation of SC Drd2+ neurons induces long-term memory and depression-like**  
114 **behavior**

115 To determine whether SC-Drd2 stimulation induces simple behavioral patterns or long-term  
116 emotional states, we investigated whether aversive stimulation elicits long-term affective states.  
117 To do this, we first used repeated activation of SC Drd2+ neurons to understand if would lead to  
118 depression-like behavior. In detail, ChR2 and mCherry control groups received 2.5 s repeated  
119 optogenetic stimulation for 3 consecutive trials (20 Hz, 5 ms pulse duration, 5-8 mW, 1 min  
120 interstimulus interval) over 3 consecutive days (Fig. 1.G). Five days after the previous session, a  
121 tail-suspension test revealed that the ChR2 group remained immobile significantly longer than the  
122 mCherry control group (Fig. 1.H; ChR2:  $196.1 \pm 42.72$  s, mCherry :  $139.5 \pm 47.21$  s; \* $P=0.0206$ ),  
123 confirming that Drd2+ neurons can trigger long-term emotional states.

124 We next investigated whether SC Drd2 neuronal stimulation could lead to the formation of long-  
125 term aversive memories. To answer this question, we placed mice in a contextualized box to  
126 undergo classical Pavlovian conditioning (Fig. 1.I). Mice received an 80 dB tone over 30 s  
127 conditioned stimulus (CS) terminated with a 2.5s 20 Hz optogenetic stimulation of Drd2+ SC  
128 neurons as an aversive unconditioned stimulus (US). Mice were placed in the same context without  
129 tone delivery 24 h later or placed in a different context with tone delivery. During tone presentation  
130 during the conditioning trial, freezing time for all animals was significantly higher in the ChR2 test  
131 group than in the mCherry control group (ChR2 :  $69.18\% \pm 10.91\%$ , mCherry :  $8.75\% \pm 3.68\%$ ;  
132 \*\*\*\* $P < 0.0001$ ), confirming that SC Drd2+ neurons activation promote defensive behaviors (Fig.  
133 1.J). During context retrieval, the ChR2 group spent significantly longer freezing than the mCherry  
134 controls (ChR2 :  $22.55 \pm 2.87\%$ , mCherry :  $9.81 \pm 1.67\%$  ; \*\*\* $P=0.0008$ ) (Fig. 1.K, left).  
135 Similarly, in a different context presentation of CS stimulation alone led to freezing time being  
136 significantly higher in the ChR2 group than in the mCherry group (ChR2 :  $66.40\% \pm 9.79\%$ ,  
137 mCherry :  $26.22 \pm 4.06\%$  ; \*\*\* $P=0.0008$ ) (Fig. 1.K, right), overall indicating SC Drd2+ neuronal  
138 stimulation is aversive and can be used as an effective US during memory formation.

139 Overall, these results suggest that Drd2+ neurons can not only trigger defensive responses, but are  
140 also sufficient to promote formation of conditioned memories, and provoke long-term depression-  
141 like behaviors.

142

143

144 **Chemogenetic inhibition of D2R neurons impairs defensive behavior to looming stimuli**

145 To question whether Drd2+ SC neurons are necessary to process visually-induced instinctive  
146 defensive behaviors, we unilaterally injected AAV vectors containing the chemogenetic inhibitory  
147 hM4Di receptors (AAV-DIO-HM4Di-mCherry) in the SC of Drd2-cre mice (Fig 2.A). Robust  
148 expression of mCherry was observed in the intermediate layers of the SC (Fig. 2.B). Instinctive  
149 defensive behaviors were elicited by placing mice in a box with a hiding nest, and by presenting  
150 an overhead looming stimulation known to result in a rapid flight response (Yilmaz and Meister,  
151 2013). One hour before stimulation, HM4Di-test and mCherry-control groups received an IP  
152 injection of clozapine-*N*-oxide (CNO) (Fig. 2.A). During looming stimulation, flight latency was



153 significantly higher in the HMDi-test group than in the control group (Fig 2.C; HM4Di :  $3.54 \pm$   
154  $0.56$ s; mCherry :  $2.25 \pm 0.22$ s; \*P=0.034). There was a non-significant trend for mice in the  
155 HM4Di-test group to spend less time in the nest than those in the control group, and the percentage  
156 of flight following stimulation was similar between groups (Fig. 2.D). This indicates that inhibition  
157 of Drd2+ SC neurons disrupts defensive behaviors to visual threats.

### 158 159 **Bilateral dopamine agonist quinpirole injection in the SC disrupts defensive responses to** 160 **looming stimuli**

161 We next wanted to investigate the net effect of dopamine in the superior colliculus in the context  
162 of defensive behaviors, and in particular, whether dopamine could modulate Drd2+ SC neuronal  
163 activity following visual threat. To do so, we first used patch-clamp slice recordings to characterize  
164 the effect of dopamine on Drd2 neurons. By injecting an AAV-DIO-EYFP virus into the SC of  
165 Drd2-cre mice, neurons were determined and patched on slice based on fluorescence (Fig. 3.A).  
166 Quinpirole, a selective D2 receptor agonist, was then delivered to the cells resulting in suppression  
167 of Drd2+ SC neuronal activity, with firing rate drastically reduced compared to baseline levels  
168 (100% VS. 14.54%) (Fig. 3.B). Next, to understand the physiological role of dopamine on  
169 defensive behaviors to visual threats, we bilaterally injected quinpirole or saline solution into the  
170 SC of wild type mice, and then presented looming stimulation 30 minutes later (Fig. 3.C). Flight  
171 latency was significantly shorter (Quinpirole:  $14.7 \pm 5.0$  s ; Saline:  $2.4 \pm 0.3$ s; \*P=0.026) and the  
172 probability for mice to flight to nest (Quinpirole :  $64.2 \pm 9.6\%$ ; Saline :  $95.3 \pm 3.2\%$ ; \*\*P=0.0049)  
173 was significantly longer in the quinpirole group than in the saline control group, whilst time in the  
174 nest remained similar (Fig. 3.D). This confirms that dopamine modulates the SC activity and  
175 decreases defensive responses to aerial visual threat.

176 These blunted behavioral responses to visual threats suggest that SC D2 receptors are involved in  
177 triggering instinctive defensive behaviors to visual threats, and are necessary for the normal  
178 expression of the full repertoire of mouse behavior.

### 179 180 181 **The LC is the principal candidate sending dopaminergic projections to SC Drd2+ neurons**

182 Finally, to determine the source of dopaminergic modulation in the SC, we injected the retrograde  
183 tracer cholera toxin B (CTB) into the SC (Sup. Fig. 2.A). CTB tracer was found in structures such  
184 as the primary visual cortex and the anterior cingulate cortex, both know to project to the SC  
185 (Baldwin et al., 2019; Zingg et al., 2017) (Sup. Fig. 2.B1-B2). CTB tracer was also found in the  
186 ventral tegmental area (VTA), the substantia nigra (SN), the periaqueductal gray (PAG), the  
187 paraventricular nucleus of the hypothalamus (PVN), or the dorsal raphe nucleus (DRN), known to  
188 synthesize dopamine (Björklund and Dunnett, 2007) (Sup. Fig. 2.C1-C5, D1). Finally, we found  
189 strong CTB fluorescence retrograde tracer signal in neurons in the locus coeruleus (LC), as well as  
190 the zona incerta (ZI) (Sup. Fig. 2.D2-D3). Together, these data demonstrate that SC receives  
191 numerous projections from dopaminergic structures, confirming previous reports which used  
192 equivalent methods to show that ZI and LC to be a source of dopamine in SC (Bolton et al., 2015).

193 But retrograde tracer injection of CTB is not specific to dopaminergic projections to SC Drd2  
194 neurons. To determine the dopamine source of the SC neurons expressing dopamine receptor D2,  
195 which possibly modulates defensive behaviors to visual threat, we mapped projections upstream  
196 from Drd2+ SC neurons using a Cre-dependent monosynaptic retrograde tracing technique. Drd2  
197 -Cre transgenic mice received AAV-CAG-DIO -TVA-GFP (AAV2/9) and AAV-CAG-DIO-RG  
198 (AAV2/9) virus injections into SC. Three weeks after virus injection, the SC was infected with  
199 RV-EvnA-DsRed (EnvA-pseudotyped, G-deleted and DsRed-expressing rabies virus) using the  
200 same coordinates (Fig. 4.A). Whole brains were sectioned and stained with the fluorescent  
201 dopamine synthesizing enzyme tyrosine hydroxylase (TH) to confirm upstream neurons were  
202 capable of dopamine production. We found that the TVA-GFP and RV viruses were expressed in  
203 the intermediate layers of SC (Fig. 4.B). Neurons co-expressing RV retrograde virus and TH  
204 immunofluorescence were found in the locus coeruleus of every mouse (Fig. 4.C) with  $78.34 \pm$   
205  $9.72$  % retrogradely labeled neuron being TH positive (Fig. 4.J), indicating that the LC sends  
206 dopaminergic projections to Drd2 SC neurons. Neurons in other dopaminergic structures such as  
207 the DRN, ZI, VTA, SN, PAG, or the arcuate nucleus also retrogradely expressed RV but did not  
208 co-express TH fluorescence (Sup. Fig. 3.D-G We did not find dopaminergic inputs to SC Drd2+  
209 neurons using this method (Sup. Fig. 3.J). Together, these results suggest dopamine projections to  
210 Drd2+ SC neurons could mainly come from LC.

211

## 212 **Conclusion and Discussion**

### 213 **Conclusion:**

214  
215 We investigated the function of SC neurons expressing either Drd2 or Drd1 dopaminergic receptors.  
216 Using optogenetic tools, we demonstrated that SC Drd2, but not Drd1, neuronal activation was able  
217 to induce strong defensive behaviors in the absence of threatening stimuli, and long-term effects  
218 such as fear memory and depression-like behaviors. Both chemogenetic inhibition using the  
219 HM4Di-CNO system, and physiological inhibition using the D2 receptor agonist quinpirole in  
220 vivo, impaired defensive behaviors to visual threats. Interestingly, CTB retrograde tracers revealed  
221 that SC receives projections from dopaminergic brain structures, results then extended by RV  
222 tracing showing that SC Drd2+ neurons receive transsynaptic dopaminergic projections from LC  
223 TH<sup>+</sup> neurons. These results suggest an essential and sophisticated role of dopamine in the SC, and  
224 more specifically, of the dopamine -Drd2 receptor system in regulating instinctive defensive  
225 behaviors

226

227

### 228 **Discussion:**

229

### 230 **SC Drd2 function:**

231

232 Whilst dopamine D1 and D2 receptor expression in the mice superior colliculus has been reported,  
233 their function was largely unknown. Here, we revealed that optogenetic activation of SC Drd2+  
234 neurons induced short and long-term defensive behaviors. These results are in line with previous  
235 reports showing that direct SC stimulation can induce fear-like behavior in many species (Shang  
236 et al., 2015; Wei et al., 2015; Zhou et al., 2019). Supporting this idea, we have shown that Drd2+  
237 neurons are mainly localized in the intermediate layers of the SC (Fig. 1.B), the same SC layers  
238 that project to downstream structures involved in defensive and promoting flight behavior (Evans  
239 et al., 2018; Zhou et al., 2019). Indeed, AAV tracing of SC Drd2 neurons demonstrated a projection  
240 to structures known to receive SC inputs that control defensive behaviors (Zhou et al., 2019). Drd2+  
241 neurons, of which a major proportion are excitatory, enrich the intermediate layer of the SC, (May,  
242 2006)-(Bolton et al., 2015). It is therefore possible that optogenetic activation of SC Drd2 neurons  
243 activates downstream nuclei involved in defensive behaviors, directly driving flight behaviors. In  
244 line with presented evidence showing that Drd2 neuronal stimulation is able to trigger flight in the  
245 absence of visual threat, inhibition of these neurons impairs defensive behavior following visual  
246 threat. Indeed, we demonstrated that quinpirole injection into the SC weakens defensive responses,  
247 in particular by increasing flight latency and decreasing the flight probability. However, defensive  
248 behavior was not only diminished, indicating that disruption of SC Drd2 neurons alone is not  
249 sufficient to abolish defense. It is therefore likely that the SC Drd2 neurons do not encompass all  
250 of the SC neurons that project to emotion-related structures downstream.

251  
252 In parallel, when exploring the function of Drd1 SC neurons, we found that this subpopulation is  
253 not involved in triggering defensive behaviors. Given that Drd1 and Drd2 receptors may have  
254 different on behavior (Liu et al., 2019; Smith and Kabelik, 2017; Tu et al., 2019; Verharen et al.,  
255 2019), it may have been expected that SC Drd1 neurons facilitate action to generate flight  
256 execution, but this not been observed here. Neurons with Drd1 and Drd2 receptors do not always  
257 participate in the same function (Smith and Kabelik, 2017). For example, D2, but not D1, neurons  
258 modulate auditory responses in the inferior colliculus (Hoyt et al., 2019). It is therefore reasonable  
259 to think that the function of Drd1 SC neurons may simply remain masked; indeed, dopamine at the  
260 SC level may have a broader scope of action than fear, such as the integration of visual signals  
261 among which looming-mimicking collisions are only a subset. Thus, to understand Drd1 SC role  
262 it would be necessary in the future to study the effects of dopamine on other non-emotional and  
263 more classical functions of the colliculus such as visuo-motor integration (Isa and Saito, 2001;  
264 Marino et al., 2008; Munoz et al., 1991) and attention selection (Ding et al., 2019; Evans et al.,  
265 2018; White et al., 2019).

266  
267 Finally, we can suppose that a portion of the SC neurons expressing dopaminergic receptors act  
268 more locally at the microcircuitry level. Knowing that 37% of the Drd2 neurons are GABAergic  
269 (Bolton et al., 2015), it is likely that most form local inhibitory projections at the microcircuit level  
270 (May, 2006; Tardif et al., 2005; Villalobos et al., 2018; Vokoun et al., 2010). Such local interactions  
271 are necessary to control visual integration (Kasai and Isa, 2016; Muller et al., 2018; Vokoun et al.,

272 2010) and have even been associated with visual attention (Hafed et al., 2009). Knowing then, that  
273 a proportion of these Drd2 neurons are GABAergic, and that we confirmed that DA inhibits Drd2  
274 SC neurons, we can reasonably propose that DA can also act by removing local inhibition.  
275 Weakened defensive responses could therefore be partly due to a release of lateral inhibition in the  
276 SC (Kasai and Isa, 2016), disrupting the integration of the visual signal (or tuning it to optimize  
277 detection of specific spatio-temporal frequencies) and indirectly leading to a reduction of defensive  
278 responses. This raises the broader question of whether neuromodulation at the SC level disrupts  
279 visual perception or impairs subsequent selection of action.

280 It is essential now to explore the effect of dopamine on local SC micro-circuitry to determine  
281 whether it participates in visual signal integration, and which categories of behaviors it affects.

282

283

284 **On the circuitry aspect:**

285

286 Dopaminergic receptors at the SC level have been found in several species (Ciliax et al., 2000;  
287 Hurd et al., 2001; Mengod et al., 1992; Pérez-Fernández et al., 2014), suggesting that dopaminergic  
288 projections innervate the SC. In addition, it has been demonstrated using mice that dopaminergic  
289 projections from the ZI could target the SC (Bolton et al., 2015). In this study, the method used  
290 consisted of injecting latex microspheres, a retrograde tracer that has no particular affinity for  
291 neurons expressing dopaminergic receptors, into the SC. Thus, it demonstrated that ZI and LC  
292 could send DA projections to SC, but not that these projections target neurons expressing dopamine  
293 receptors. Here, we used an RV retrograde virus in conjunction with Drd2-cre mice, specifically  
294 mapping upstream pathways to SC neurons expressing DA receptors. We observed that several  
295 dopaminergic structures project towards Drd2 neurons, but we only found that the LC as sent  
296 dopaminergic projections to the SC (see Sup. Fig. 3.J). Since previous work revealed DA  
297 projections to SC, in particular from ZI, it will be necessary to carefully detail their connectivity  
298 patterns, and to understand their function.

299

300 Although we do not exclude the existence of other dopaminergic projections, we propose that the  
301 LC is the main source of dopamine for Drd2+ SC neurons, which is able to modulate defensive  
302 behavior. This hypothesis is in line with a previous report from our group demonstrating that the  
303 LC sends TH positive adrenergic projections to the SC (Li et al., 2018). But these projections  
304 modulated defensive behavior following physiological stress by increasing flight probability,  
305 whilst here, we show a decrease of fear-like behaviors. To explain this discrepancy, it is necessary  
306 to note that Lie et al. used a NE antagonist, whilst we used DA agonist. Extending this idea, and  
307 knowing that a majority of LC neurons are NE positive (Amaral and Sinnamon, 1977; Robertson  
308 et al., 2013), it has been demonstrated that LC terminals can co-release dopamine and  
309 adrenaline/noradrenaline (Devoto et al., 2005a, 2005b). Dissociating the effect of DA from the one  
310 of NE in the context of LC-SC projections is important, but represents a real technical challenge to  
311 date.

312

313 The LC-SC projections we revealed are only moderate and are unlikely to be responsible alone for  
314 the behavioral phenomena reported in the present article. In addition, our CTB data are in line with  
315 previous reports showing that the ZI sends dopaminergic projections to the SC. But these  
316 projections do not target SC neurons expressing dopaminergic receptors, raising the question of  
317 the mechanisms by which DA reaches dopaminergic receptors in the SC. Partly answering this  
318 question, it is known and discussed that dopamine does not necessarily follow canonical  
319 neurotransmission mechanisms, and could follow a volume transmission mode of delivery (Fuxe  
320 et al., 2015; Liu et al., 2018; Sulzer et al., 2016). First, in other brain structures it has been shown  
321 that dopamine can be highly localized at the extra-synaptic rather than synaptic level (Devoto et  
322 al., 2003), whilst dopamine receptors are sometimes located far from their release sites (Caillé et  
323 al., 1996). In addition, recent studies revealed that the secretion of dopamine does not only take  
324 place at the synapse level, but could take place en-passant along the dopaminergic axons (Liu et  
325 al., 2018). This supports the hypothesis that diffusion and dilution are the main modes of action of  
326 the transmitter (for review: (Cragg and Rice, 2004; Rice et al., 2011; Rice and Cragg, 2008), which  
327 could explain how DA reaches dopaminergic receptors in SC without necessarily directly targeting  
328 specific receptors. In parallel, it is important to note that only a few sets of dopaminergic boutons  
329 can effectively release DA, as is the case in the striatum where only a minority of DA vesicles can  
330 release the transmitter (Pereira et al., 2016). This suggest that dopaminergic pathways to SC,  
331 whether projecting to DA receptors or not, are not necessarily active. Research on these particular  
332 DA transmission processes are still in their infancy, but this may explain in part why a proportion  
333 of the dopaminergic projections to SC do not directly synapse with neurons expressing D2  
334 receptors. However, if such DA diffusion appears to be the prevalent mode of action in SC, it would  
335 make the role of DA in SC circuitry more challenging to elucidate. Understanding how, and in  
336 which context, dopamine is dynamically released in the SC is a key question for the near future.

337  
338 It is of great importance for an animal to be able to predict the occurrence of a potential threat. A  
339 non-exclusive way to solve this problem is to optimize the detection of a threatening signal at the  
340 earliest stages of visual processing. We hypothesized DA could play such a role in the SC, and  
341 demonstrated Drd2 SC neurons were able to induce defensive responses even in the absence of  
342 visual threat, and were necessary for the normal expression of an optimal behavior. Our results  
343 suggest DA and its receptors regulate innate defensive behaviors in a sophisticated manner. Still,  
344 understanding in which condition DA is released in the SC is of high important, especially by  
345 which global and local mechanisms DA reaches its SC receptors, and understanding the dynamics  
346 involved. Understanding how defensive behaviors can be modulated from the earliest perceptive  
347 stage could help to find new therapeutic solutions to psychiatric pathologies, such as post-traumatic  
348 disorders.

349

350

351 **Materials & Methods**



## 352 **EXPERIMENTAL MODEL AND SUBJECT DETAILS**

353  
354 **Animals:**  
355 All husbandry and experimental procedures in this study were approved by the Animal Care and  
356 Use Committees at the Shenzhen Institute of Advanced Technology (SIAT) or Wuhan Institute of  
357 Physics and Mathematics (WIPM), Chinese Academy of Sciences (CAS). Adult (6 to 8 weeks old)  
358 male C57BL/6J (Guangdong Medical Laboratory Animal Center, Guangzhou, China), Drd1-Cre  
359 (MMRRC\_030989-UCD), and Drd2 -Cre (MMRRC\_032108-UCD) mice were used in this study.  
360 Mice were housed at 22–25 °C on a circadian cycle of 12-hour light and 12-hour dark with ad-  
361 libitum access to food and water.

## 362 **METHOD DETAILS**

### 363 **Viral vector preparation**

364  
365 For optogenetic experiments, the plasmids for AAV2/9 viruses encoding *EF1α::* DIO-hChR2  
366 (H134R)-mCherry, *EF1α::* DIO-HM4Di- mCherry and *EF1α::* DIO- mCherry were used. Viral  
367 vector titers were in the range of  $3\text{-}6\times 10^{12}$  genome copies per ml (gc)/ml and viruses were all  
368 packaged by BrainVTA Co., Ltd., Wuhan. For rabies tracing, the viral vectors AAV2/9-*EF1α::*  
369 DIO-TVA-GFP, AAV2/9-*EF1α::* DIO-RV-G, and EnvA-RV-dG-dsRed were used and were all  
370 packaged by BrainVTA Co., Ltd., Wuhan. For retrograde tracing, AAV and rabies viruses were  
371 purified and concentrated to titers at approximately  $3\times 10^{12}$  v.g /ml and  $1\times 10^9$  pfu/ml, respectively.

### 372 **Virus injection**

373  
374 Mice were placed in a stereotaxic apparatus (RWD, China) before being anesthetized with  
375 pentobarbital (i.p., 80 mg/kg). Anesthesia was then maintained with isoflurane (1%) during surgery  
376 and virus injections. Injections were conducted with a 10 µl syringe (Neuros; Hamilton, Reno,  
377 USA), using a microsyringe pump (UMP3/Micro4, USA). Coordinates for virus injection of the  
378 SC in Drd2-Cre mice (total volume of 350 nl) were: bregma -3.80 mm, lateral  $\pm$  0.80 mm and dura  
379 -1.80 mm. SC in Drd1-Cre mice (total volume of 200 nl) coordinates were: AP -3.40 mm, ML  $\pm$ 0.  
380 50 mm, and DV -1.5 mm. Viruses were delivered unilaterally for ChR2 and bilaterally for HM4Di.

### 381 **Trans-synaptic tracer labeling**

382  
383 All animal procedures were performed in Biosafety level 2 (BSL2) animal facilities. To  
384 determine whether the inputs of Drdr2+ and Drd1+ neurons in the SC, Drd2-Cre mice and Drd1  
385 were used for trans-mono-synaptic tracing based on the modified rabies virus. A mixture of  
386 AAV2/9-*EF1α::* DIO-RV-G and AAV2/9-*EF1α::* DIO-TVA-GFP (1:1, total volume of 200-250  
387 nl) was injected into the SC region. For virus injection into the SC in Drd2-Cre mice (total volume  
388 of 250 nl), the following coordinates were used: AP -3.80 mm, ML  $\pm$  0.80 mm and DV -1.80 mm.  
389 Coordinates for SC injections in Drd1-Cre mice (total volume of 200 nl) were: AP -3.40 mm, ML  
390  $\pm$ 0. 50 mm, and DV -1.5 mm. Three weeks later, 200 nl of EnvA-RV-dG-dsRed virus was injected  
391 into the same coordinates in these mice. Mice were sacrificed one week after RV injection.  
392

393

### 394 **Implantation of optical fiber(s) and cannulas**

395 A 200  $\mu\text{m}$  optic fiber (NA: 0.37; NEWDOON, Hangzhou) was unilaterally implanted into the  
396 SC in *Drd2* mice (AP, -3.8 mm; ML, -0.6 mm; DV, -1.4 mm) and SC in *Drd1* mice (AP, -3.40 mm;  
397 ML, -0.5 mm; DV, -1.0 mm). For pharmacological experiments, drug cannulas were bilaterally  
398 implanted into the SC (AP, -3.8 mm; ML,  $\pm 0.6$  mm; DV, -1.4 mm). The mice were used for  
399 behavioral tests at least 1-2 weeks after surgery.

400

### 401 **Patch-clamp electrophysiology**

402 Coronal slices (300  $\mu\text{m}$ ) containing the SC were prepared, using standard procedures, from 14-  
403 16 week-old *Drd2-Cre* mice, which had received virus injections three weeks earlier. Recordings  
404 in SC *Drd2+* cells were made on visually identified neurons expressing EYFP.

405 Brain slice were cut using a vibratome (Leica) into a chilled slicing solution (in mM: 1.3  
406  $\text{NaH}_2\text{PO}_4$ , 25  $\text{NaHCO}_3$ , 110 Choline Chloride, 0.6 Na-Pyruvate, 0.5  $\text{CaCl}_2$ , 7  $\text{MgCl}_2$ , 2.5 KCl, 1.3  
407 Na-Ascorbate). Then, slices were incubated at 32  $^\circ\text{C}$  for 30 min in artificial cerebrospinal fluid  
408 (ACSF) (in mM: 10 Glucose, 2  $\text{CaCl}_2$ , 1.3  $\text{MgCl}_2$ , 125 NaCl, 2.5 KCl, 1.3  $\text{NaH}_2\text{PO}_4$ , 25  $\text{NaHCO}_3$ ,  
409 1.3 Na-Ascorbate, 0.6 Na-Pyruvate, pH 7.35) and allowed to equilibrate to room temperature for  
410 >30 min. The osmolarity of all solutions was maintained at 280–300 mOsm.

411 For current clamp, pipettes were filled with a solution (in Mm: 105 Cs-gluconate, 10  
412 phosphocreatine (Na), 0.07  $\text{CaCl}_2$ , 4 EGTA, 10 HEPES, 4 Na-ATP, 1 Na-GTP, and 3  $\text{MgCl}_2$ ).  
413 To identify the spike dopaminergic nature, D2 agonist quinpirole (10  $\mu\text{M}$ ) was added at the end  
414 of recordings.

415 Pipettes with a resistance of 3–5  $\text{M}\Omega$  were formed by a micropipette puller (Sutter P-2000). We  
416 viewed neurons with an upright fixed-stage microscope (FN-S2N; Nikon., Japan) during whole-  
417 cell patch recording with a MultiClamp700B amplifier (Molecular Devices). Analog signals were  
418 low-pass filtered at 2 kHz, digitized at 20 kHz using Digidata 1440A, and recorded using pClamp  
419 10 software (Molecular Devices).

### 420 **Histology, immunohistochemistry, and microscopy**

421 Mice were anesthetized with an overdose of chloral hydrate (10% W/V, 300 mg/kg body weight,  
422 i.p.) and were then transcardially perfused with PBS, followed by ice-cold 4% paraformaldehyde  
423 (PFA; Sigma) in PBS. Brains were extracted and submerged in 4% PFA at 4  $^\circ\text{C}$  overnight to post-  
424 fix. After pots-fixing, brains were transferred to 30% sucrose to equilibrate. Coronal slices (40  $\mu\text{m}$ )  
425 were using a cryostat microtome (Lecia CM1950, Germany). Freely floating sections were  
426 incubated with PBS, containing blocking solution (0.3% TritonX-100 and 10% normal goat serum,  
427 NGS in PBS, 1 h at room temperature). Primary antibody (rabbit anti-TH, 1:500, Abcam) were  
428 incubated the slices. The antibody was diluted in PBS with 3% NGS and 0.1% TritonX-100  
429 overnight. The secondary antibody Alexa fluor 488 (1:200, Jackson) was used to incubated at room  
430 temperature for 1 h. Slices were mounted and covered slipped with anti-fade reagent with DAPI  
431 (ProLong Gold Antifade Reagent with DAPI, life technologies) or signal enhancer (Image-iT FX  
432 Signal Enhancer, Invitrogen). All images were photographed and analyzed with a Leica TCS SP5  
433 laser scanning confocal microscope and ImageJ, Image Pro-plus software.

434 For the rabies monosynaptic tracing, images were taken and then overlaid with The Mouse  
435 Brain in Stereotaxic Coordinates to locate the brain slices. Retrogradely identified positive neurons  
436 upstream of SC were manually counted by an individual experimenter blind to the experiment  
437 groups.

438  
439 **Optogenetic manipulation**  
440 Before optogenetic stimulation, animals were handled and habituated for 10-15 min to the  
441 looming box with a nest shelter in corner one day before testing. During the test session, mice were  
442 put into the same looming box and allowed to freely explore the box for 3-5 min, then received 2.5  
443 s of 473-nm blue laser (Aurora-220-473, NEWDOON, Hangzhou) with light power at the fiber tips  
444 (20 Hz, 5 ms pulse duration, 5-8 mW). Light stimulation was unilaterally delivered to the SC Drd1+  
445 and Drd2+ cells without looming stimulation in this experiment. Light was presented twice at  
446 approximately 3-min intervals via a manual trigger. We manually triggered stimulation when mice  
447 were at the far end of the open field, away from the nest position, within one body-length distance  
448 from the wall.

449  
450 **Fear conditioning**  
451 Fear conditioning was done over two sessions: a training session and a memory test. During the  
452 training session, mice were put into a fear conditioning chamber, located inside a sound-isolation  
453 box. The Drd2-cre mice were allowed to freely explore the chamber for 3 mins before an 85-dB,  
454 2-kHz tone was presented for 30 s as conditioned stimulation (CS). This co-terminated with 2.5  
455 secs light stimulations (20 Hz, 5 ms pulse duration, 5-8 mW) separated by 1-min intervals. Mice  
456 were kept in the training chamber for another 60 s before being moved outside. Each mouse  
457 received 5 repeated CS paired light stimulations.

458  
459 During the memory test, mice performed consecutive tests: context test and tone test. 1) context  
460 test: mice were placed back into the altered chamber (modified by changing the white silver side  
461 walls to plastic walls decorated with black and white stripes, and changing the metal grid floor to  
462 a plastic sheet) for 5 mins to measure levels of freezing. 2) Tone test: an 80-dB, 2-kHz tone was  
463 presented for 1 min after the context test to measure freezing levels during the tone.  
464 20% ethanol was used to clean the chamber to eliminate odors from other mice. All behavior were  
465 recorded and scored by the FreezeFrame fear conditioning system (Lafayette Instrument).  
466 Behavioral analysis was done blind to treatment group.

467  
468 **Tail suspension test**  
469 Before the tail suspension test, Drd2-cre mice received repeated 2.5 s blue-light stimulation (20  
470 Hz, 5 ms pulse duration, 5-8 mW) in the SC with 1-min intervals (3 times repeated light  
471 stimulation) in one day. This photostimulation was conducted for 3 consecutive days and then tail  
472 suspension tests were performed 7 days after last light stimulation.  
473 During the test session, the tail suspension test was done in a 50 x 50 x 30 cm box with an open  
474 front. Mice were individually suspended by the tail with adhesive tape for 6 mins. An HD digital

475 camera (Sony, Shanghai, China) positioned in front of the box was used to record behavior.  
476 Immobility were analyzed with Anymaze software (Stoelting Co.).

477

### 478 **Looming test and Pharmacological antagonism**

479 A 40 x 40 x 30 cm closed Plexiglas box with a shelter nest in the corner was used for the overhead  
480 looming test. The looming box contained an LCD monitor on the ceiling to present a black disc  
481 expanding from a visual angle of 2° to 20° in 0.3 s, i.e., expanding speed of 60 °/s. Each looming  
482 stimulus included 15 repetitions of the expanding disc stimulus with a 0.066 s interval between  
483 each. Each looming stimulus lasted 5.5 s.

484 An HD digital camera (Sony, Shanghai, China) was used to record behavior. The behavioral test  
485 included two sessions, a pre-test and a test session. During the pre-test session, mice were handled  
486 and habituated for 10-15 min to the looming box one day before testing. During the test session,  
487 200 nl saline (control) or D2 receptor agonists per hemisphere (Quinpirole, 0.25 µg /side) was  
488 bilaterally infused into the SC (AP, -3.8 mm; ML, ±0.6 mm; DV, -1.85 mm) 30 min before a  
489 looming test. Then, mice were put in the box and allowed to freely explore the box for 3-5 min.  
490 For pharmacological experiments plus looming, mice received 3 trials of looming stimulus but only  
491 defensive behavior to the first stimulus was analyzed; no observable adaptation was observed in  
492 any of the experiments.

493

### 494 **Behavioral analysis**

495 Behavioral data were analyzed with Anymaze software. Individual time courses were plotted  
496 where T=0 ms as the time of stimulation. There three measures were obtained as indices of light-  
497 evoked or looming-evoked defensive behavior. (1) latency to return nest: the time from  
498 photostimulation or looming stimulus presentation to time when the mouse escaped/entered the  
499 nest; (2) time spent in nest (% of 1 min bin): time spent in the nest following looming stimulus or  
500 photostimulation; (3) percentage of flight (% of 3 repeated trial of looming stimulus). the  
501 probability of flight to nest after looming stimulus in 3 repeated photostimulation.  
502 Flight is defined as episodes where speed increases 4 times than the average speed in cases where  
503 the final position is in the nest.

504 For all mice in this study, virus expression and fiber placements or cannula were confirmed by  
505 histological staining after our data were collected. Virus expression, behavioral tests and behavior  
506 analyses were performed by different experimenters. Decisions to discarded data on any given day  
507 was done blind to the behavioral groupings.

508

### 509 **QUANTIFICATION AND STATISTICAL ANALYSIS**

510 All statistics were performed in Graph Pad Prism (GraphPad Software, Inc.), unless otherwise  
511 indicated. Paired student tests, unpaired student tests, and one-way ANOVAs were used and  
512 Bonferroni post hoc comparisons were conducted to detect significant main effects or interactions.  
513 In all statistical measures a P value <0.05 was considered statistically significant. Post hoc  
514 significance values were set as \*P< 0.05, \*\*P< 0.01, \*\*\*P< 0.001 and \*\*\*\*P< 0.0001; all statistical  
515 tests used are indicated in the figure legends.

516

## 517 **Acknowledgements**

518 This work was supported by National Natural Science Foundation of China (NSFC) 31630031  
519 (L.W.), NSFC 31930047(L.W.), NSFC 81425010 (L.W.), NSFC31971072 (L.L.); International  
520 Partnership Program of Chinese Academy of Sciences 172644KYS820170004 (L.W.); Helmholtz-  
521 CAS Joint Research Grant GJHZ1508 (L.W.); the Strategic Priority Research Program of Chinese  
522 Academy of Science, XDB32030200; Guangdong Provincial Key Laboratory of Brain  
523 Connectome and Behavior 2017B030301017 (L.W.); JCYJ20170413164535041(L.W.),  
524 JCYJ20150401150223647 (Z.Z.); Shenzhen Municipal Funding GJHZ20160229200136090  
525 (L.W.); Shenzhen Discipline Construction Project for Neurobiology DRCSM [2016]1379  
526 (L.W.); Science and Technology Planning Project of Guangdong Province  
527 2018B030331001(L.W.); CAS President's International Fellowship 2020FYB0005 (Q.M.);  
528 Guangdong Province International Scientific and Technological Cooperation 2019A050508008  
529 (M.Q.).

530

## 531 **Author contributions**

532 M.Q., Z.Z., and L.L. contributed equally to this work. M.Q., Z.Z., L.L. and L.W. designed and  
533 initiated the project. Z.Z. performed virus injections, fiber and cannula implantation. M.Q., Z.Z.  
534 and L.L. setup the behavior protocol. Z.Z., X.F., Q.S., Z.L. (Zhuogui Lei), M.Q and L.L. performed  
535 behavior experiments. Z.Z., M.Q. and L.L. processed and analyzed behavior data. Z.Z. performed  
536 rabies virus injections. Q.Y., H.Z., S.C., and Z.Z. performed immunohistochemistry and  
537 quantitative analyzes of the tracing data. S.C. performed the patch clamp recording. Z.L.  
538 (Zhonghua Lu) provided the viral vectors. Q.M., Z.Z., L.L. and L.W. interpreted the results. M.Q.,  
539 Z.Z and L.L. wrote the manuscript. L.W. supervised all aspects of the project.

540

## 541 **Supplementary Figure Legends**

542 **Fig. 1:** Optostimulation of SC D2+ neurons induced strong defensive behaviors and fear memory

543 **Fig. 2:** Chemogenetic inhibition of SC D2+ neurons decreased the looming-induced defensive  
544 behavior of the mice

545 **Fig. 3:** Drd2 agonist suppressed SC D2+ neurons firing at brain slice recording intra-SC, and SC  
546 infusion dampened the looming-induced defensive behaviors in vivo.

547 **Fig. 4:** SC D2+ neurons receive direct monosynaptic TH-positive inputs from LC.

548 **Sup. Fig. 1:** The outputs of SCD2+ neuron

549 **Sup. Fig. 2:** CTB-based retrograde tracing identified the input of SC neurons

550 **Sup. Fig. 3:** Rabies virus-based viral tracing identified the input of SC D2+ neurons

551

## 552 **Figure Legends**



553  
554 **Figure 1. Optostimulation of SC<sup>D2+</sup> neurons induced strong defensive behaviors and fear memory**  
555 (A) Optogenetic strategy showing unilateral SC optical activation and experimental timeline.  
556 (B-C) Representative IHC shows selective targeting of ChR2-mCherry to SC<sup>D2+</sup> neurons (B) and SC<sup>D1+</sup>  
557 neurons (C), and the position of the fiber track (blue, DAPI; red, ChR2-mCherry; scale bars, 500  $\mu$ m  
558 and 50  $\mu$ m, respectively; solid line, fiber track).  
559 (D) Representative track plots of the SC<sup>D2+</sup> activated (up) and SC<sup>D1+</sup> (bottom) activated mice in open  
560 field with a nest demonstrating flight-to-nest defensive behavior of SC<sup>D2+</sup> activated mouse.  
561 (E) Representative speed profiles illustrate shorter flight latency after SC-D2+ activation in the ChR2-  
562 mCherry group than in the mCherry control group.  
563 (F) Following photostimulation of SC<sup>D2+</sup> neurons, the D2:: ChR2 group had lower flight  
564 latencies and higher time in the nest compared with controls (n<sub>D2-mCherry</sub> = 11 mice; n<sub>D1-ChR2</sub> = 7 mice, n<sub>D2-  
565 ChR2</sub> = 7 mice; \*\**P*<sub>latency</sub> = 0.0032, *F*<sub>2, 22 latency</sub> = 7.553, \*\*\*\**P*<sub>time</sub> < 0.0001, *F*<sub>2, 22 time</sub> = 48.9; Bonferroni *post hoc*  
566 test, for latency: D2-ChR2 VS. D2-mCherry, \*\**P*<sub>latency</sub> = 0.0052; D1-ChR2 VS. D2-ChR2, \*\**P*<sub>latency</sub> =  
567 0.0109; for time in nest: D2-ChR2 VS. D2-mCherry, \*\*\*\**P*<sub>time</sub> < 0.0001; D1-ChR2 VS. D2-ChR2,  
568 \*\*\*\**P*<sub>time</sub> < 0.0001; one-way ANOVA).  
569 For all graphs, data were presented as mean  $\pm$  SEM.  
570 (G) Experimental procedure for the repeated activation of SC<sup>D2+</sup> neurons caused depression-like behavior  
571 as indexed by elevated freezing.  
572 (H) Repeated activation of SC<sup>D2+</sup> neurons induced significant higher immobility time in the ChR2 group  
573 than in the control group (n<sub>mCherry</sub> = 11 mice, n<sub>ChR2</sub> = 7 mice, *t*<sub>16</sub> = 2.569, \**P* = 0.0206; Unpaired student  
574 test).  
575 (I) Schematic of the conditioned pairing of activation of SC<sup>D2+</sup> neuronal activation and the tone.  
576 (J) Optogenetic stimulation SC<sup>D2+</sup> neurons increased freezing levels during conditioning (n<sub>D2-mCherry</sub> = 11  
577 mice; n<sub>D2-ChR2</sub> = 7 mice; Group x trial effect interaction, *F*<sub>4, 19</sub> = 11.77, \*\*\*\**P* < 0.0001, two-way ANOVA  
578 bonferroni *post hoc* test, \*\*\*\**P* < 0.0001).  
579 (K) Testing day: compared with D2-mCherry group, the D2-ChR2 group had a significantly higher  
580 percentage of freezing time in context (K-left) and tone (K-right) memory retrieval (n<sub>mCherry</sub> = 11 mice, n<sub>ChR2</sub> = 7 mice,  
581 for context, *t*<sub>16</sub> = 4.13, \*\*\**P* = 0.0008; for tone, *t*<sub>16</sub> = 4.132, \*\*\**P* = 0.0018; unpaired student  
582 test).

583  
584 **Figure 2. Chemogenetic inhibition of SC<sup>D2+</sup> neurons decreased looming-induced defensive behavior.**  
585 (A) Chemogenetic strategy showing bilateral SC inhibition and experimental timeline.  
586 (B) Representative IHC showing selective targeting of hM4Di-mCherry to SC<sup>D2+</sup> neurons (blue, DAPI;  
587 red, hM4Di-mCherry; scale bars, 200  $\mu$ m and 20  $\mu$ m, respectively).  
588 (C) After CNO administration, the flight latency in the hM4Di group was higher than the mCherry  
589 controls (n<sub>mCherry</sub> = 10 mice, n<sub>hM4Di</sub> = 8 mice, for latency, *t*<sub>16</sub> = 2.326, \**P* = 0.0335; for time in nest, *t*  
590 <sub>16</sub> = 1.769, *P* = 0.0959; for percentage of flight, *t*<sub>16</sub> = 0.1582, *P* = 0.8762; unpaired student *t* test).  
591 For all graphs, data are presented as mean  $\pm$  SEM.

592  
593 **Figure 3. Drd2 agonist suppressed SC<sup>D2+</sup> neurons firing at brain slice recording intra-SC, and SC**  
594 **infusion dampened the looming-induced defensive behaviors in vivo.**  
595 (A) Schematic showing in vitro patch-clamp slice recording of single-unit SC-D2+ neuronal activity  
596 following Drd2 agonist injection into the SC. AAV- DIO-EYFP injections in D2-cre mice were used to  
597 visualize D2-positive neurons.  
598 (B) *Right*, representative example of firing rate showing that the activity of SC-D2+ neurons was suppressed  
599 after infusion with Drd2 agonist; *left*, quantification of the firing rate of SC-D2+ neurons (n = 3 cells  
600 from 3 mice, data presented as mean  $\pm$  SEM, \*\**P* = 0.0033, *t*<sub>2</sub> = 17.30, Paired student *t* test)  
601 (C) Bilateral Drd2 agonist strategy showing bilateral SC agonist infusion and experimental timeline.  
602 (D) The looming-induced flight-to-nest behavior was reduced by intra-SC infusion of Quinpirole  
603 (dopamine receptor 2 agonist), resulting in a recovery of flight latency and lower percentage of flight-

604 to-nest ( $n_{\text{saline}} = 14$  mice,  $n_{\text{Quinpirole}} = 14$  mice, for latency,  $t_{27} = 2.353$ ,  $*P = 0.0262$ ; for time in nest,  $t_{27} = 2.372$ ,  $P = 0.909$ ; for percentage of flight,  $t_{27} = 3.007$ ,  $**P = 0.0049$ ; Unpaired student t test).  
605  
606 For all graphs, data are presented as mean  $\pm$  SEM.

607

608 **Figure 4. SC<sup>D2+</sup> neurons receive direct monosynaptic TH-positive inputs from LC.**

609 (A) Schematic of the rabies virus-based cell-type-specific monosynaptic tracing protocol.

610 (B) Representative images denoting the starter cells in the SC of D2-Cre mice (Red, rabies-dsRed; green,  
611 TVA; blue, DAPI; scale bar, 250  $\mu\text{m}$  and 25  $\mu\text{m}$ , respectively).

612 (C-F) SC-D2 RV retrograde labelled upstream brain regions and co-labelling with TH. Retrograde  
613 labelled cells (Red) in the (C) Locus coeruleus (LC), (D) Dorsal raphe (DRN), (E) Substantia nigra,  
614 compact part (SNc), Substantia nigra, reticular part (SNr), (F) Ventral tegmental area (VTA), (G) Zona  
615 incerta (ZI), (H) Ventromedial hypothalamic nucleus (VMH), Arcuate hypothalamic nucleus (Arc)  
616 and (I) Periaqueductal gray (PAG) with inputs to SC-D2+ neurons, (Red, rabies-dsRed; green, TH;  
617 blue, DAPI, scale bar, 250  $\mu\text{m}$  and 20  $\mu\text{m}$  respectively).

618 (J) Quantification of the percentage of rabies-dsRed labeled neurons that overlap with TH in regions  
619 upstream of SC-D2+ cells. ( $n = 5$  mice,  $F_{6, 28} = 65.01$ ,  $***P < 0.0001$ , data presented as mean  $\pm$  SEM;  
620 one-way ANOVA).

621

622 **Supplementary Figure 1. The outputs of SC<sup>D2+</sup> neuron**

623 (A) Anterograde tracing of SC<sup>D2+</sup> neurons show fibers in the Parabigeminal nucleus (PBGN), Pontine  
624 nuclei (Pn), Periaqueductal gray (PAG), Ventral tegmental area (VTA) and lateral posterior nucleus of  
625 the thalamus (LP), and with images of the terminal fibers (scale bars, 500  $\mu\text{m}$ ).

626 (B) Schematic image of the outputs of the D2-Cre neurons from SC.

627

628 **Supplementary Figure 2. CTB-based retrograde tracing identified the input of SC neurons.**

629 (A) CTB-594 retrograde tracer was injected into SC.

630 (B-D) CTB-594 labeled neurons in regions of primary visual cortex, V1(B1); ACC (B2); VTA(B3); SNc  
631 (C1); SNr (C1); DRN (C2); PVN (C3); PAG (D1); VMH (D2); ZI (D2) and LC (D3); (Red, CTB; blue,  
632 DAPI, scale bar, 1000  $\mu\text{m}$ , 500  $\mu\text{m}$  and 20  $\mu\text{m}$ , respectively).

633

634 **Supplementary Figure 3. Rabies virus-based viral tracing identified the input of**

635 **SC<sup>D2+</sup> neurons.**

636 (A-E) Rabies-dsRed labeled neurons in regions of LC, DRN, VTA, PAG, anterior cingulate cortex (ACC),  
637 VMH, Arc, SNr, SNc and Primary visual cortex (V1); (Red, rabies-dsRed; blue, DAPI, scale bar, 200  $\mu\text{m}$   
638 and 20  $\mu\text{m}$ ).

639 (F) Quantification of the number of rabies-dsRed labeled neurons in regions upstream of the SC ( $n = 18-48$   
640 slices from 5 mice, data presented as mean  $\pm$  SEM)

641

642

643

644

645

646

647 **References**

- 648
- 649 Almeida, I., Soares, S.C., Castelo-Branco, M., 2015. The Distinct Role of the  
650 Amygdala, Superior Colliculus and Pulvinar in Processing of Central and  
651 Peripheral Snakes. *PLoS ONE* 10, e0129949.  
652 <https://doi.org/10.1371/journal.pone.0129949>
- 653 Amaral, D., Sinnamon, H., 1977. The locus coeruleus: neurobiology of a central  
654 noradrenergic nucleus. *Progress in Neurobiology* 9, 147–196.  
655 [https://doi.org/10.1016/0301-0082\(77\)90016-8](https://doi.org/10.1016/0301-0082(77)90016-8)
- 656 Baldwin, M.K.L., Young, N.A., Matrov, D., Kaas, J.H., 2019. Cortical projections to the  
657 superior colliculus in grey squirrels ( *Sciurus carolinensis* ). *Eur J Neurosci* 49,  
658 1008–1023. <https://doi.org/10.1111/ejn.13867>
- 659 Barbano, M.F., Wang, H.-L., Zhang, S., Miranda-Barrientos, J., Estrin, D.J., Figueroa-  
660 González, A., Liu, B., Barker, D.J., Morales, M., 2020. VTA Glutamatergic  
661 Neurons Mediate Innate Defensive Behaviors. *Neuron* 107, 368-382.e8.  
662 <https://doi.org/10.1016/j.neuron.2020.04.024>
- 663 Barrios, J.P., Wang, W.-C., England, R., Reifenberg, E., Douglass, A.D., 2020.  
664 Hypothalamic Dopamine Neurons Control Sensorimotor Behavior by  
665 Modulating Brainstem Premotor Nuclei in Zebrafish. *Current Biology*  
666 S0960982220313336. <https://doi.org/10.1016/j.cub.2020.09.002>
- 667 Basso, M.A., May, P.J., 2017. Circuits for Action and Cognition: A View from the  
668 Superior Colliculus. *Annu Rev Vis Sci* 3, 197–226.  
669 <https://doi.org/10.1146/annurev-vision-102016-061234>
- 670 Björklund, A., Dunnett, S.B., 2007. Dopamine neuron systems in the brain: an  
671 update. *Trends in Neurosciences* 30, 194–202.  
672 <https://doi.org/10.1016/j.tins.2007.03.006>
- 673 Bolton, A.D., Murata, Y., Kirchner, R., Kim, S.-Y., Young, A., Dang, T., Yanagawa, Y.,  
674 Constantine-Paton, M., 2015. A Diencephalic Dopamine Source Provides  
675 Input to the Superior Colliculus, where D1 and D2 Receptors Segregate to  
676 Distinct Functional Zones. *Cell Reports* 13, 1003–1015.  
677 <https://doi.org/10.1016/j.celrep.2015.09.046>
- 678 Caillé, I., Dumartin, B., Bloch, B., 1996. Ultrastructural localization of D1 dopamine  
679 receptor immunoreactivity in rat striatonigral neurons and its relation with  
680 dopaminergic innervation. *Brain Research* 730, 17–31.  
681 [https://doi.org/10.1016/0006-8993\(96\)00424-6](https://doi.org/10.1016/0006-8993(96)00424-6)

- 682 Ciliax, B.J., Nash, N., Heilman, C., Sunahara, R., Hartney, A., Tiberi, M., Rye, D.B.,  
683 Caron, M.G., Niznik, H.B., Levey, A.I., 2000. Dopamine D(5) receptor  
684 immunolocalization in rat and monkey brain. *Synapse* 37, 125–145.  
685 [https://doi.org/10.1002/1098-2396\(200008\)37:2<125::AID-SYN7>3.0.CO;2-](https://doi.org/10.1002/1098-2396(200008)37:2<125::AID-SYN7>3.0.CO;2-7)  
686 7
- 687 Cohen, J.Y., Haesler, S., Vong, L., Lowell, B.B., Uchida, N., 2012. Neuron-type-specific  
688 signals for reward and punishment in the ventral tegmental area. *Nature* 482,  
689 85–88. <https://doi.org/10.1038/nature10754>
- 690 Cragg, S.J., Rice, M.E., 2004. DAncing past the DAT at a DA synapse. *Trends Neurosci*  
691 27, 270–277. <https://doi.org/10.1016/j.tins.2004.03.011>
- 692 de Jong, J.W., Afjei, S.A., Pollak Dorocic, I., Peck, J.R., Liu, C., Kim, C.K., Tian, L.,  
693 Deisseroth, K., Lammel, S., 2019. A Neural Circuit Mechanism for Encoding  
694 Aversive Stimuli in the Mesolimbic Dopamine System. *Neuron* 101, 133-  
695 151.e7. <https://doi.org/10.1016/j.neuron.2018.11.005>
- 696 Devoto, P., Flore, G., Longu, G., Pira, L., Gessa, G.L., 2003. Origin of extracellular  
697 dopamine from dopamine and noradrenaline neurons in the medial  
698 prefrontal and occipital cortex. *Synapse* 50, 200–205.  
699 <https://doi.org/10.1002/syn.10264>
- 700 Devoto, P., Flore, G., Saba, P., Fa, M., Gessa, G.L., 2005a. Stimulation of the locus  
701 coeruleus elicits noradrenaline and dopamine release in the medial  
702 prefrontal and parietal cortex. *J Neurochem* 92, 368–374.  
703 <https://doi.org/10.1111/j.1471-4159.2004.02866.x>
- 704 Devoto, P., Flore, G., Saba, P., Fà, M., Gessa, G.L., 2005b. Co-release of  
705 noradrenaline and dopamine in the cerebral cortex elicited by single train and  
706 repeated train stimulation of the locus coeruleus. *BMC Neurosci* 6, 31.  
707 <https://doi.org/10.1186/1471-2202-6-31>
- 708 Ding, Y., Xu, N., Gao, Y., Wu, Z., Li, L., 2019. The role of the deeper layers of the  
709 superior colliculus in attentional modulations of prepulse inhibition.  
710 *Behavioural Brain Research* 364, 106–113.  
711 <https://doi.org/10.1016/j.bbr.2019.01.052>
- 712 Essig, J., Felsen, G., 2016. Warning! Dopaminergic Modulation of the Superior  
713 Colliculus. *Trends in Neurosciences* 39, 2–4.  
714 <https://doi.org/10.1016/j.tins.2015.12.002>
- 715 Evans, D.A., Stempel, A.V., Vale, R., Ruehle, S., Lefler, Y., Branco, T., 2018. A synaptic  
716 threshold mechanism for computing escape decisions. *Nature* 558, 590–594.  
717 <https://doi.org/10.1038/s41586-018-0244-6>

- 718 Fiorillo, C.D., 2003. Discrete Coding of Reward Probability and Uncertainty by  
719 Dopamine Neurons. *Science* 299, 1898–1902.  
720 <https://doi.org/10.1126/science.1077349>
- 721 Frau, R., Mosher, L.J., Bini, V., Pillolla, G., Pes, R., Saba, P., Fanni, S., Devoto, P.,  
722 Bortolato, M., 2016. The neurosteroidogenic enzyme 5 $\alpha$ -reductase  
723 modulates the role of D1 dopamine receptors in rat sensorimotor gating.  
724 *Psychoneuroendocrinology* 63, 59–67.  
725 <https://doi.org/10.1016/j.psyneuen.2015.09.014>
- 726 Fuxe, K., Agnati, L.F., Marcoli, M., Borroto-Escuela, D.O., 2015. Volume  
727 Transmission in Central Dopamine and Noradrenaline Neurons and Its  
728 Astroglial Targets. *Neurochem Res* 40, 2600–2614.  
729 <https://doi.org/10.1007/s11064-015-1574-5>
- 730 Hafed, Z.M., Goffart, L., Krauzlis, R.J., 2009. A Neural Mechanism for Microsaccade  
731 Generation in the Primate Superior Colliculus. *Science* 323, 940–943.  
732 <https://doi.org/10.1126/science.1166112>
- 733 Howard, C.D., Li, H., Geddes, C.E., Jin, X., 2017. Dynamic Nigrostriatal Dopamine  
734 Biases Action Selection. *Neuron* 93, 1436-1450.e8.  
735 <https://doi.org/10.1016/j.neuron.2017.02.029>
- 736 Hoyt, J.M., Perkel, D.J., Portfors, C.V., 2019. Dopamine Acts via D2-Like Receptors  
737 to Modulate Auditory Responses in the Inferior Colliculus. *eNeuro* 6,  
738 ENEURO.0350-19.2019. <https://doi.org/10.1523/ENEURO.0350-19.2019>
- 739 Hurd, Y.L., Suzuki, M., Sedvall, G.C., 2001. D1 and D2 dopamine receptor mRNA  
740 expression in whole hemisphere sections of the human brain. *Journal of*  
741 *Chemical Neuroanatomy* 22, 127–137. [https://doi.org/10.1016/S0891-](https://doi.org/10.1016/S0891-0618(01)00122-3)  
742 [0618\(01\)00122-3](https://doi.org/10.1016/S0891-0618(01)00122-3)
- 743 Isa, T., Saito, Y., 2001. The direct visuo-motor pathway in mammalian superior  
744 colliculus; novel perspective on the interlaminar connection. *Neuroscience*  
745 *Research* 41, 107–113. [https://doi.org/10.1016/S0168-0102\(01\)00278-4](https://doi.org/10.1016/S0168-0102(01)00278-4)
- 746 Isbell, L.A., 2011. *The fruit, the tree, and the serpent: why we see so well.* Harvard  
747 University Press, Cambridge, Mass.
- 748 Ito, S., Feldheim, D.A., 2018. The Mouse Superior Colliculus: An Emerging Model for  
749 Studying Circuit Formation and Function. *Front. Neural Circuits* 12, 10.  
750 <https://doi.org/10.3389/fncir.2018.00010>
- 751 Jo, Y.S., Heymann, G., Zweifel, L.S., 2018. Dopamine Neurons Reflect the  
752 Uncertainty in Fear Generalization. *Neuron* 100, 916-925.e3.  
753 <https://doi.org/10.1016/j.neuron.2018.09.028>



- 754 Kardamakis, A.A., Saitoh, K., Grillner, S., 2015. Tectal microcircuit generating visual  
755 selection commands on gaze-controlling neurons. *Proc Natl Acad Sci USA*  
756 112, E1956–E1965. <https://doi.org/10.1073/pnas.1504866112>
- 757 Kasai, M., Isa, T., 2016. Imaging population dynamics of surround suppression in the  
758 superior colliculus. *Eur J Neurosci* 44, 2543–2556.  
759 <https://doi.org/10.1111/ejn.13371>
- 760 Lanius, R.A., Rabellino, D., Boyd, J.E., Harricharan, S., Frewen, P.A., McKinnon, M.C.,  
761 2017. The innate alarm system in PTSD: conscious and subconscious  
762 processing of threat. *Current Opinion in Psychology* 14, 109–115.  
763 <https://doi.org/10.1016/j.copsyc.2016.11.006>
- 764 Le, Q.V., Isbell, L.A., Matsumoto, J., Le, V.Q., Nishimaru, H., Hori, E., Maior, R.S.,  
765 Tomaz, C., Ono, T., Nishijo, H., 2016. Snakes elicit earlier, and monkey faces,  
766 later, gamma oscillations in macaque pulvinar neurons. *Sci Rep* 6, 20595.  
767 <https://doi.org/10.1038/srep20595>
- 768 Li, Lei, Feng, X., Zhou, Z., Zhang, H., Shi, Q., Lei, Z., Shen, P., Yang, Q., Zhao, B., Chen,  
769 S., Li, Lin, Zhang, Y., Wen, P., Lu, Z., Li, X., Xu, F., Wang, L., 2018. Stress  
770 Accelerates Defensive Responses to Looming in Mice and Involves a Locus  
771 Coeruleus-Superior Colliculus Projection. *Current Biology* 28, 859-871.e5.  
772 <https://doi.org/10.1016/j.cub.2018.02.005>
- 773 Liu, C., Kershberg, L., Wang, J., Schneeberger, S., Kaeser, P.S., 2018. Dopamine  
774 Secretion Is Mediated by Sparse Active Zone-like Release Sites. *Cell* 172, 706-  
775 718.e15. <https://doi.org/10.1016/j.cell.2018.01.008>
- 776 Liu, S., Tang, Y., Shu, H., Tatum, D., Bai, Q., Crawford, J., Xing, Y., Lobo, M.K.,  
777 Bellinger, L., Kramer, P., Tao, F., 2019. Dopamine receptor D2, but not D1,  
778 mediates descending dopaminergic pathway–produced analgesic effect in a  
779 trigeminal neuropathic pain mouse model: *PAIN* 160, 334–344.  
780 <https://doi.org/10.1097/j.pain.0000000000001414>
- 781 Luo, R., Uematsu, A., Weitemier, A., Aquili, L., Koivumaa, J., McHugh, T.J., Johansen,  
782 J.P., 2018. A dopaminergic switch for fear to safety transitions. *Nat Commun*  
783 9, 2483. <https://doi.org/10.1038/s41467-018-04784-7>
- 784 Maior, R.S., Hori, E., Barros, M., Teixeira, D.S., Tavares, M.C.H., Ono, T., Nishijo, H.,  
785 Tomaz, C., 2011. Superior colliculus lesions impair threat responsiveness in  
786 infant capuchin monkeys. *Neuroscience Letters* 504, 257–260.  
787 <https://doi.org/10.1016/j.neulet.2011.09.042>
- 788 Marino, R.A., Rodgers, C.K., Levy, R., Munoz, D.P., 2008. Spatial Relationships of  
789 Visuomotor Transformations in the Superior Colliculus Map. *Journal of*  
790 *Neurophysiology* 100, 2564–2576. <https://doi.org/10.1152/jn.90688.2008>

- 791 Matsumoto, H., Tian, J., Uchida, N., Watabe-Uchida, M., 2016. Midbrain dopamine  
792 neurons signal aversion in a reward-context-dependent manner. *eLife* 5,  
793 e17328. <https://doi.org/10.7554/eLife.17328>
- 794 May, P.J., 2006. The mammalian superior colliculus: laminar structure and  
795 connections, in: *Progress in Brain Research*. Elsevier, pp. 321–378.  
796 [https://doi.org/10.1016/S0079-6123\(05\)51011-2](https://doi.org/10.1016/S0079-6123(05)51011-2)
- 797 Mengod, G., Villaró, M.T., Landwehrmeyer, G.B., Martínez-Mir, M.I., Niznik, H.B.,  
798 Sunahara, R.K., Seeman, P., O’Dowd, B.F., Probst, A., Palacios, J.M., 1992.  
799 Visualization of dopamine D1, D2 and D3 receptor mRNA’s in human and rat  
800 brain. *Neurochemistry International* 20, 33–43.  
801 [https://doi.org/10.1016/0197-0186\(92\)90208-9](https://doi.org/10.1016/0197-0186(92)90208-9)
- 802 Muller, L., Chavane, F., Reynolds, J., Sejnowski, T.J., 2018. Cortical travelling waves:  
803 mechanisms and computational principles. *Nat Rev Neurosci* 19, 255–268.  
804 <https://doi.org/10.1038/nrn.2018.20>
- 805 Munoz, D., Pelisson, D., Guitton, D., 1991. Movement of neural activity on the  
806 superior colliculus motor map during gaze shifts. *Science* 251, 1358–1360.  
807 <https://doi.org/10.1126/science.2003221>
- 808 Nicholson, A.A., Friston, K.J., Zeidman, P., Harricharan, S., McKinnon, M.C.,  
809 Densmore, M., Neufeld, R.W.J., Théberge, J., Corrigan, F., Jetly, R., Spiegel,  
810 D., Lanius, R.A., 2017. Dynamic causal modeling in PTSD and its dissociative  
811 subtype: Bottom-up versus top-down processing within fear and emotion  
812 regulation circuitry: DCM in PTSD and Its Dissociative Subtype. *Hum. Brain*  
813 *Mapp.* 38, 5551–5561. <https://doi.org/10.1002/hbm.23748>
- 814 Pereira, D.B., Schmitz, Y., Mészáros, J., Merchant, P., Hu, G., Li, S., Henke, A., Lizardi-  
815 Ortiz, J.E., Karpowicz, R.J., Morgenstern, T.J., Sonders, M.S., Kanter, E.,  
816 Rodriguez, P.C., Mosharov, E.V., Sames, D., Sulzer, D., 2016. Fluorescent false  
817 neurotransmitter reveals functionally silent dopamine vesicle clusters in the  
818 striatum. *Nat Neurosci* 19, 578–586. <https://doi.org/10.1038/nn.4252>
- 819 Pérez-Fernández, J., Kardamakis, A.A., Suzuki, D.G., Robertson, B., Grillner, S., 2017.  
820 Direct Dopaminergic Projections from the SNc Modulate Visuomotor  
821 Transformation in the Lamprey Tectum. *Neuron* 96, 910–924.e5.  
822 <https://doi.org/10.1016/j.neuron.2017.09.051>
- 823 Pérez-Fernández, J., Stephenson-Jones, M., Suryanarayana, S.M., Robertson, B.,  
824 Grillner, S., 2014. Evolutionarily conserved organization of the dopaminergic  
825 system in lamprey: SNc/VTA afferent and efferent connectivity and D2  
826 receptor expression: The Dopaminergic System in the Lamprey. *J. Comp.*  
827 *Neurol.* 522, 3775–3794. <https://doi.org/10.1002/cne.23639>

- 828 Rabellino, D., Densmore, M., Frewen, P.A., Théberge, J., McKinnon, M.C., Lanius,  
829 R.A., 2016. Aberrant Functional Connectivity of the Amygdala Complexes in  
830 PTSD during Conscious and Subconscious Processing of Trauma-Related  
831 Stimuli. *PLoS ONE* 11, e0163097.  
832 <https://doi.org/10.1371/journal.pone.0163097>
- 833 Rice, M.E., Cragg, S.J., 2008. Dopamine spillover after quantal release: Rethinking  
834 dopamine transmission in the nigrostriatal pathway. *Brain Research Reviews*  
835 58, 303–313. <https://doi.org/10.1016/j.brainresrev.2008.02.004>
- 836 Rice, M.E., Patel, J.C., Cragg, S.J., 2011. Dopamine release in the basal ganglia.  
837 *Neuroscience* 198, 112–137.  
838 <https://doi.org/10.1016/j.neuroscience.2011.08.066>
- 839 Robertson, S.D., Plummer, N.W., de Marchena, J., Jensen, P., 2013. Developmental  
840 origins of central norepinephrine neuron diversity. *Nat Neurosci* 16, 1016–  
841 1023. <https://doi.org/10.1038/nn.3458>
- 842 Shang, C., Liu, Z., Chen, Z., Shi, Y., Wang, Q., Liu, S., Li, D., Cao, P., 2015. A  
843 parvalbumin-positive excitatory visual pathway to trigger fear responses in  
844 mice. *Science* 348, 1472–1477. <https://doi.org/10.1126/science.aaa8694>
- 845 Smith, A.N., Kabelik, D., 2017. The effects of dopamine receptor 1 and 2 agonists  
846 and antagonists on sexual and aggressive behaviors in male green anoles.  
847 *PLoS ONE* 12, e0172041. <https://doi.org/10.1371/journal.pone.0172041>
- 848 Sparks, D.L., 1986. Translation of sensory signals into commands for control of  
849 saccadic eye movements: role of primate superior colliculus. *Physiol. Rev.* 66,  
850 118–171. <https://doi.org/10.1152/physrev.1986.66.1.118>
- 851 Sulzer, D., Cragg, S.J., Rice, M.E., 2016. Striatal dopamine neurotransmission:  
852 Regulation of release and uptake. *Basal Ganglia* 6, 123–148.  
853 <https://doi.org/10.1016/j.baga.2016.02.001>
- 854 Tardif, E., Delacuisine, B., Probst, A., Clarke, S., 2005. Intrinsic connectivity of human  
855 superior colliculus. *Exp Brain Res* 166, 316–324.  
856 <https://doi.org/10.1007/s00221-005-2373-z>
- 857 Tu, G., Ying, L., Ye, L., Zhao, J., Liu, N., Li, J., Liu, Y., Zhu, M., Wu, Y., Xiao, B., Guo, H.,  
858 Guo, F., Wang, H., Zhang, Lin, Zhang, Lu, 2019. Dopamine D1 and D2  
859 Receptors Differentially Regulate Rac1 and Cdc42 Signaling in the Nucleus  
860 Accumbens to Modulate Behavioral and Structural Plasticity After Repeated  
861 Methamphetamine Treatment. *Biological Psychiatry* 86, 820–835.  
862 <https://doi.org/10.1016/j.biopsych.2019.03.966>
- 863 Verharen, J.P.H., Adan, R.A.H., Vanderschuren, L.J.M.J., 2019. Differential  
864 contributions of striatal dopamine D1 and D2 receptors to component

865 processes of value-based decision making. *Neuropsychopharmacol.* 44,  
866 2195–2204. <https://doi.org/10.1038/s41386-019-0454-0>

867 Villalobos, C.A., Wu, Q., Lee, P.H., May, P.J., Basso, M.A., 2018. Parvalbumin and  
868 GABA Microcircuits in the Mouse Superior Colliculus. *Front. Neural Circuits*  
869 12, 35. <https://doi.org/10.3389/fncir.2018.00035>

870 Vokoun, C.R., Jackson, M.B., Basso, M.A., 2010. Intralaminar and Interlaminar  
871 Activity within the Rodent Superior Colliculus Visualized with Voltage  
872 Imaging. *Journal of Neuroscience* 30, 10667–10682.  
873 <https://doi.org/10.1523/JNEUROSCI.1387-10.2010>

874 Wei, P., Liu, N., Zhang, Z., Liu, X., Tang, Y., He, X., Wu, B., Zhou, Z., Liu, Y., Li, J., Zhang,  
875 Y., Zhou, X., Xu, L., Chen, L., Bi, G., Hu, X., Xu, F., Wang, L., 2015. Processing  
876 of visually evoked innate fear by a non-canonical thalamic pathway. *Nat*  
877 *Commun* 6, 6756. <https://doi.org/10.1038/ncomms7756>

878 White, B.J., Itti, L., Munoz, D.P., 2019. Superior colliculus encodes visual saliency  
879 during smooth pursuit eye movements. *Eur J Neurosci* ejn.14432.  
880 <https://doi.org/10.1111/ejn.14432>

881 Yilmaz, M., Meister, M., 2013. Rapid Innate Defensive Responses of Mice to  
882 Looming Visual Stimuli. *Current Biology* 23, 2011–2015.  
883 <https://doi.org/10.1016/j.cub.2013.08.015>

884 Zhou, Z., Liu, X., Chen, S., Zhang, Z., Liu, Y., Montardy, Q., Tang, Y., Wei, P., Liu, N.,  
885 Li, L., Song, R., Lai, J., He, X., Chen, C., Bi, G., Feng, G., Xu, F., Wang, L., 2019.  
886 A VTA GABAergic Neural Circuit Mediates Visually Evoked Innate Defensive  
887 Responses. *Neuron* 103, 473-488.e6.  
888 <https://doi.org/10.1016/j.neuron.2019.05.027>

889 Zingg, B., Chou, X., Zhang, Z., Mesik, L., Liang, F., Tao, H.W., Zhang, L.I., 2017. AAV-  
890 Mediated Anterograde Transsynaptic Tagging: Mapping Corticocollicular  
891 Input-Defined Neural Pathways for Defense Behaviors. *Neuron* 93, 33–47.  
892 <https://doi.org/10.1016/j.neuron.2016.11.045>

893

894

# Figure 1

bioRxiv preprint doi: <https://doi.org/10.1101/2021.02.12.430615>; this version posted February 12, 2021. The copyright holder for this preprint (which was not certified by peer review) is the author/funder, who has granted bioRxiv a license to display the preprint in perpetuity. It is made available under aCC-BY-NC 4.0 International license.

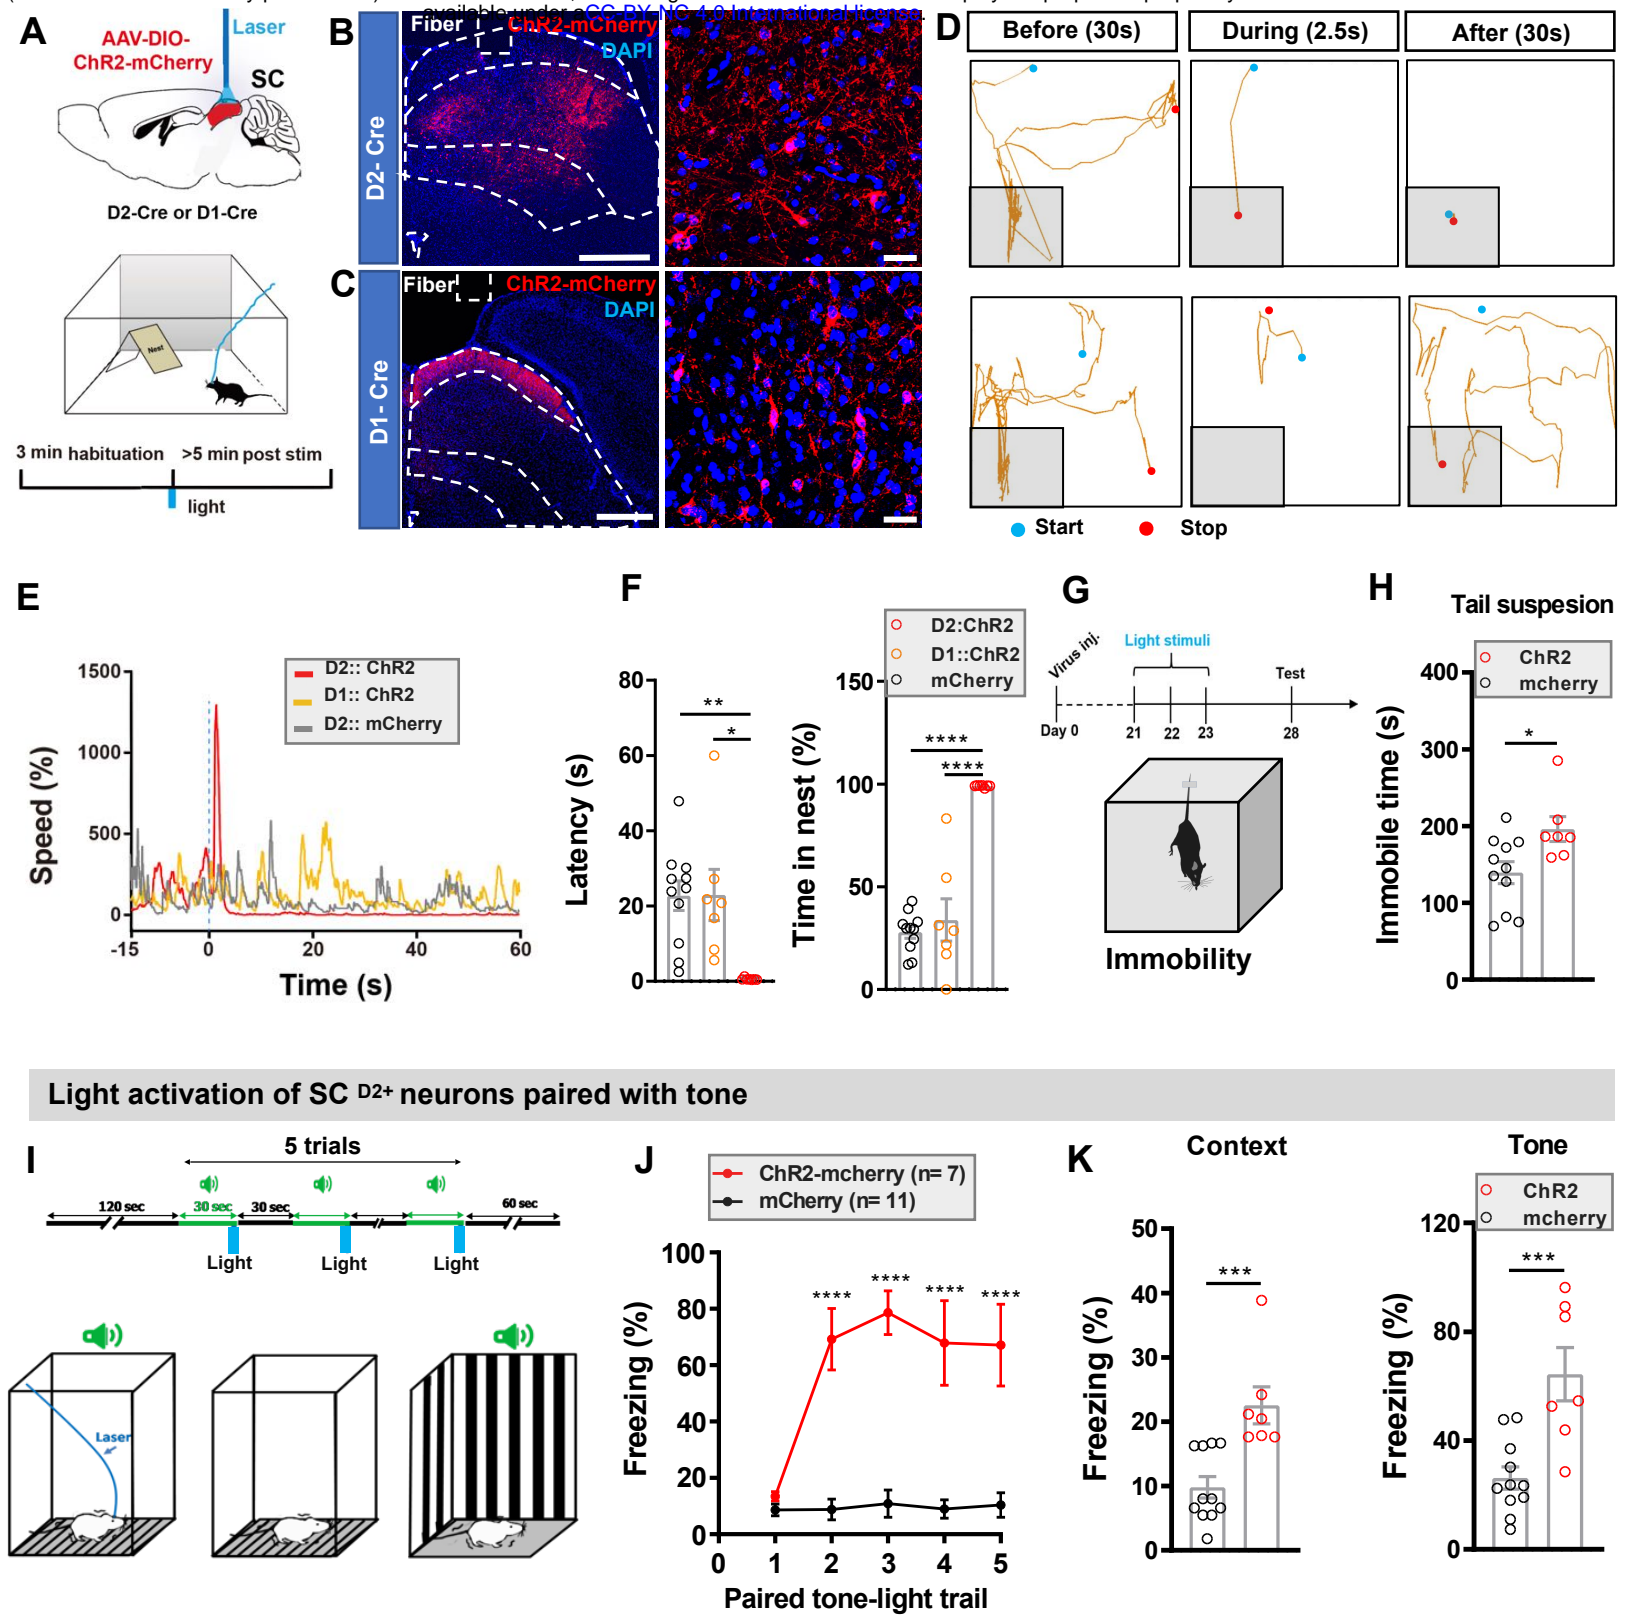



## Figure 2

**A** bioRxiv preprint doi: <https://doi.org/10.1101/2021.02.12.430615>; this version posted February 12, 2021. The copyright holder for this preprint (which was not certified by peer review) is the author/funder, who has granted bioRxiv a license to display the preprint in perpetuity. It is made available under aCC-BY-NC 4.0 International license.

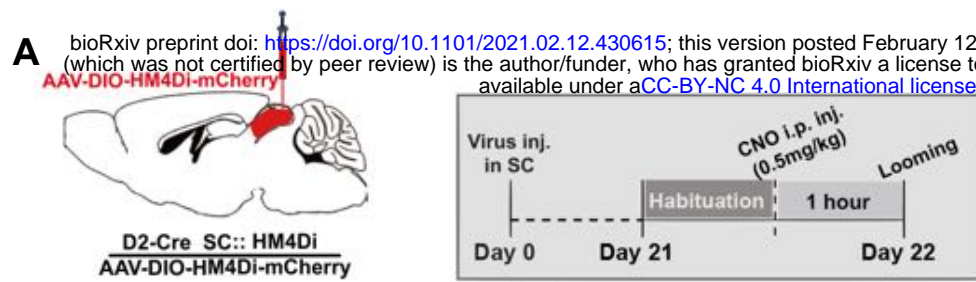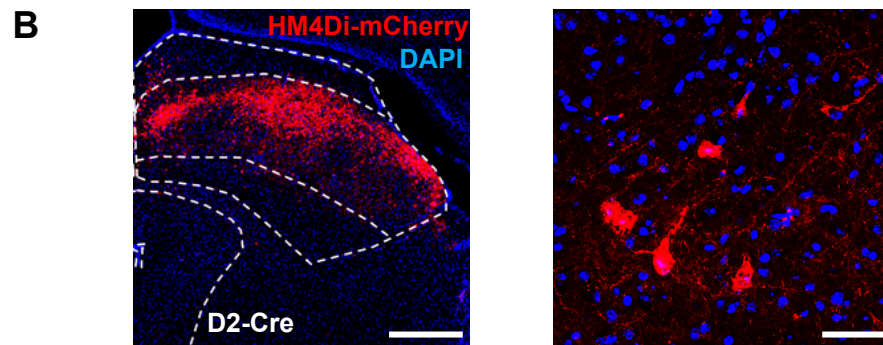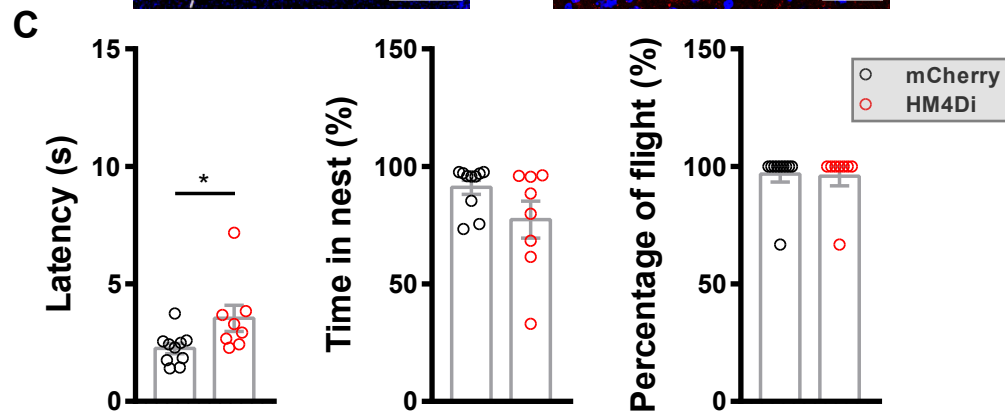

# Figure 3

## D2 Agonist in SC

bioRxiv preprint doi: <https://doi.org/10.1101/2021.02.12.430615>; this version posted February 12, 2021. The copyright holder for this preprint (which was not certified by peer review) is the author/funder, who has granted bioRxiv a license to display the preprint in perpetuity. It is made available under aCC-BY-NC 4.0 International license.

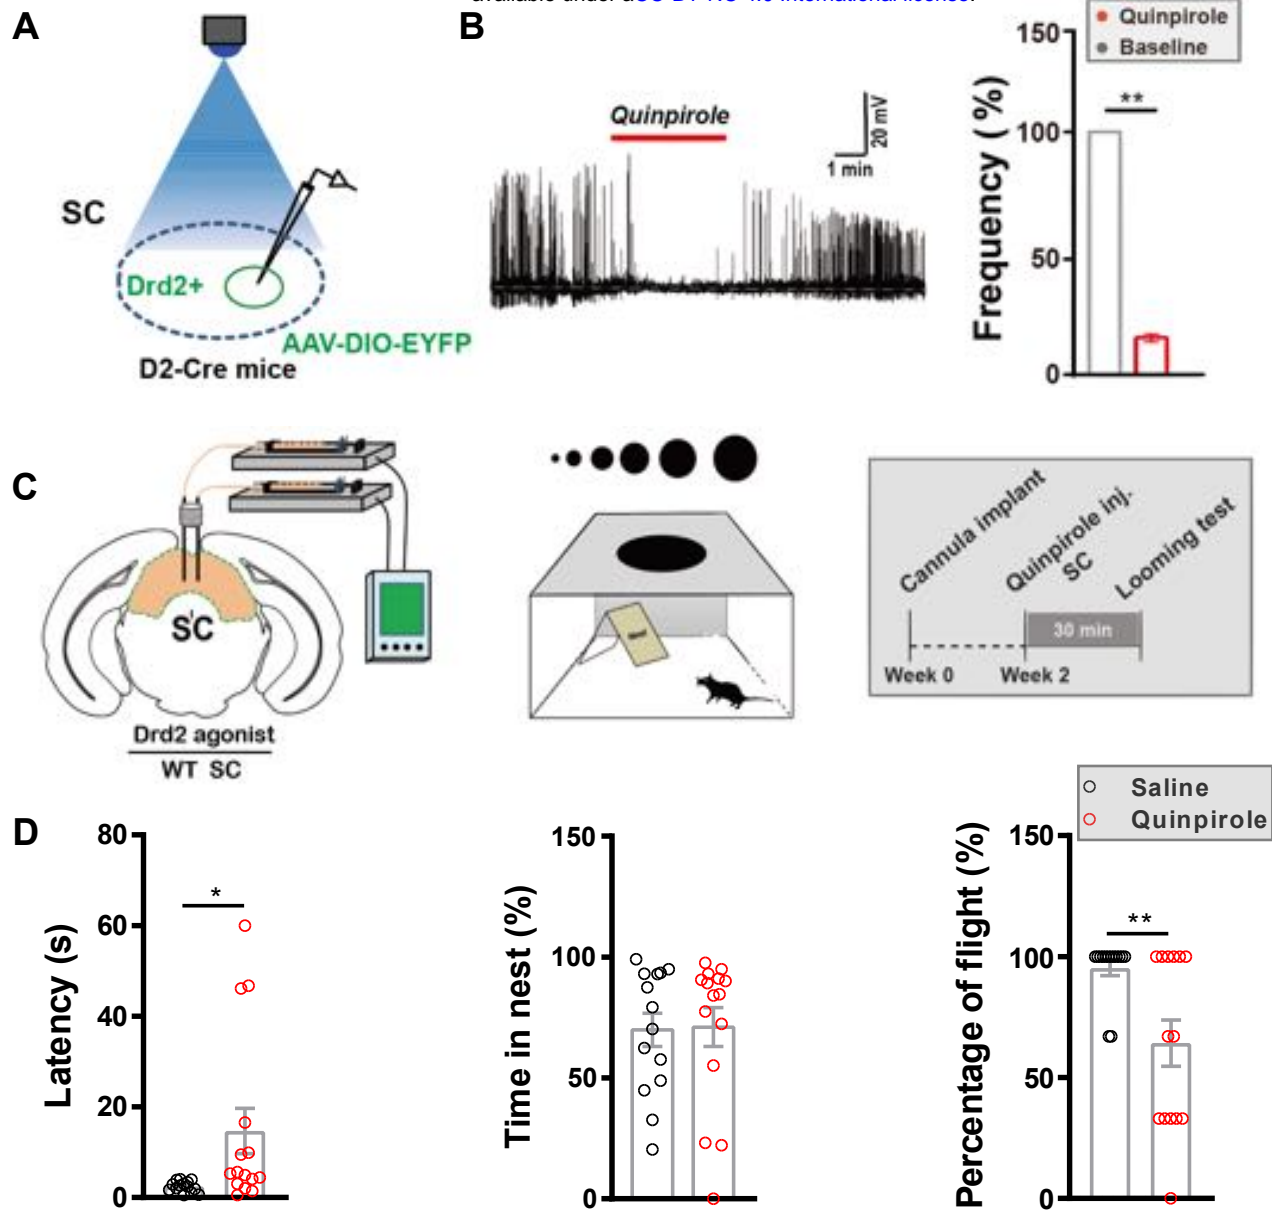

**Figure 4**

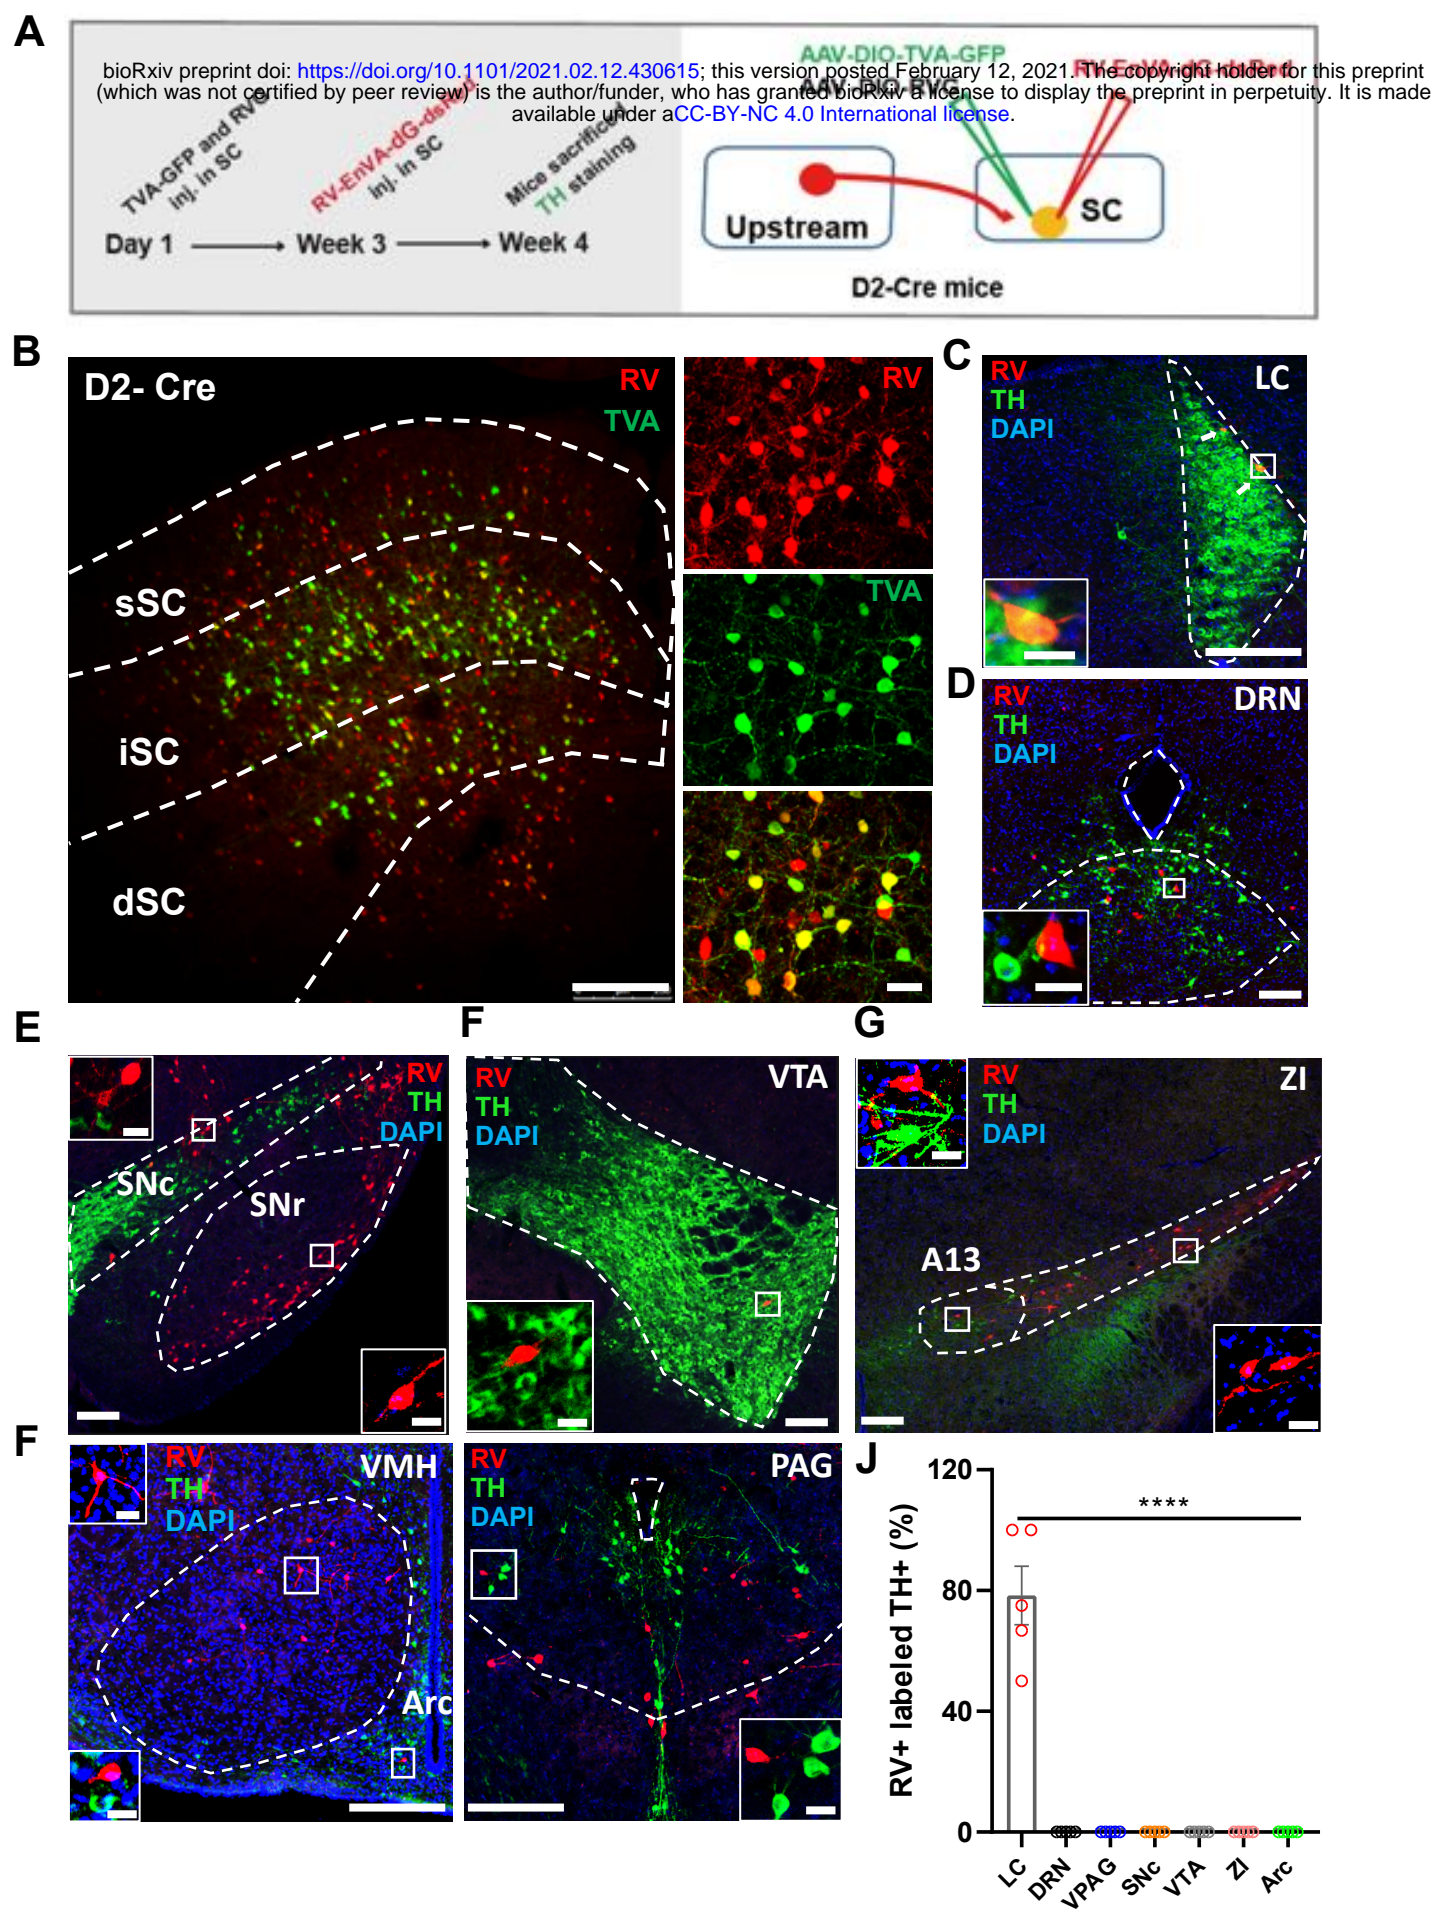



# Sup. Figure 1

## A

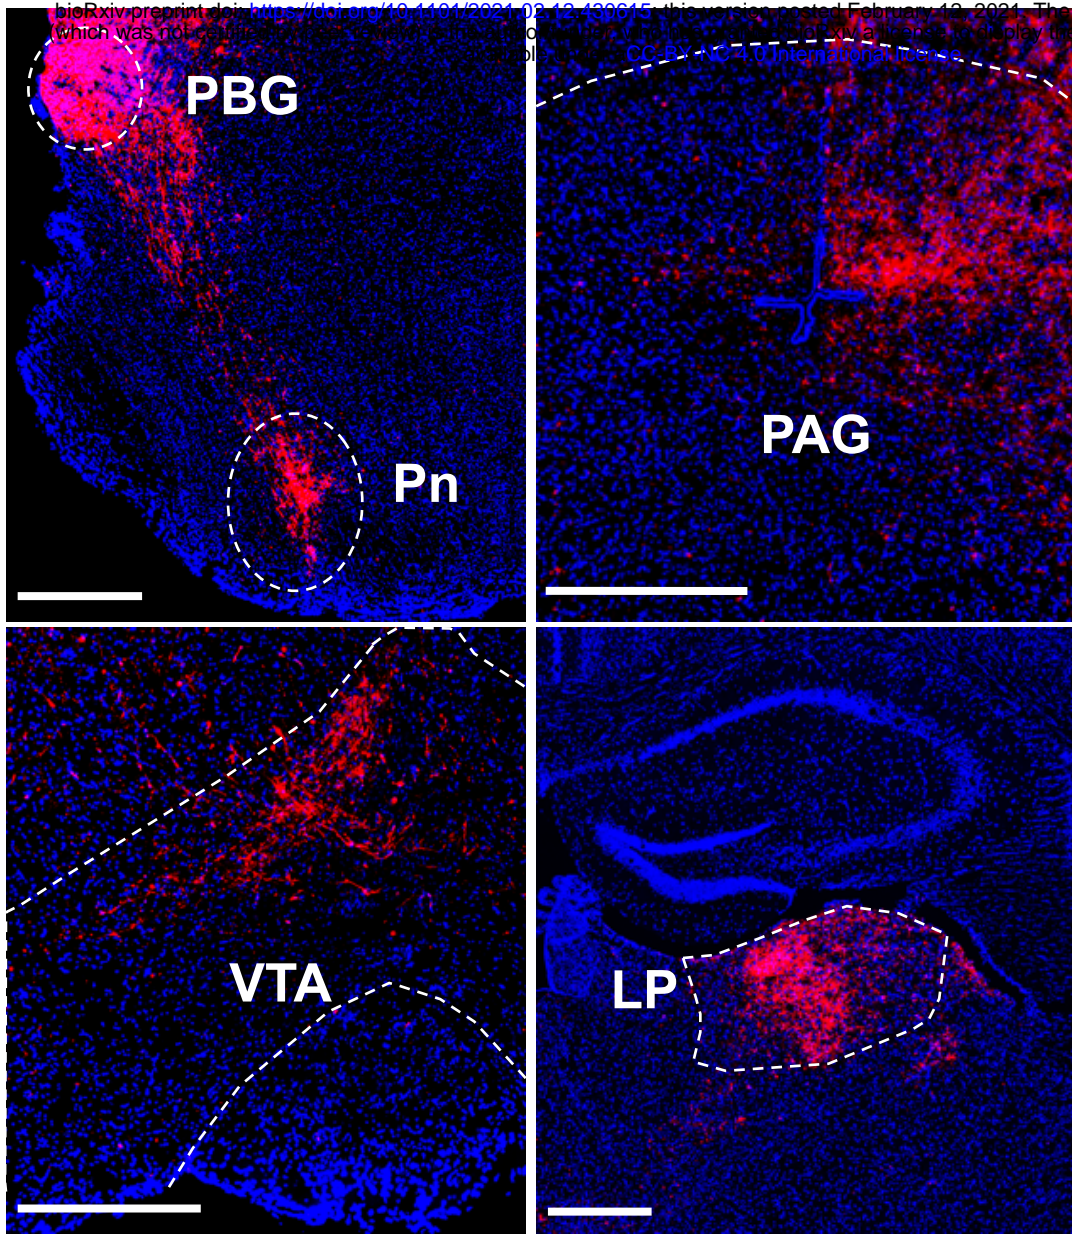

## B

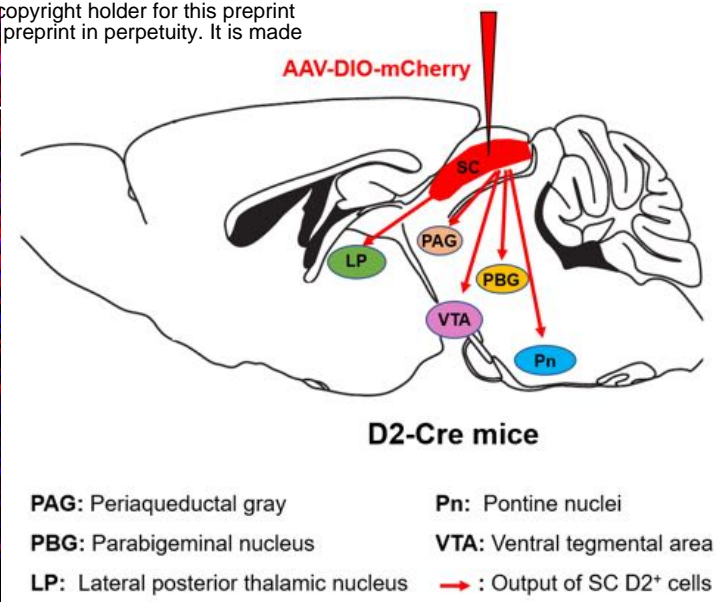



# Sup. Figure 2

A

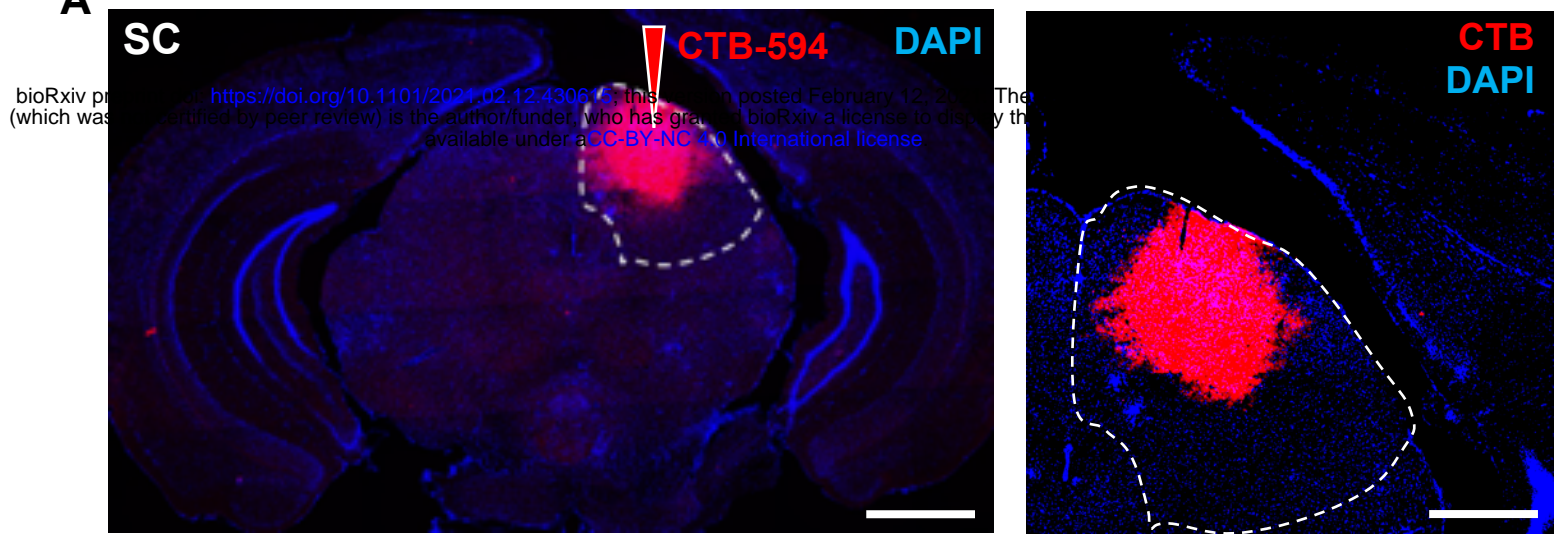

B1

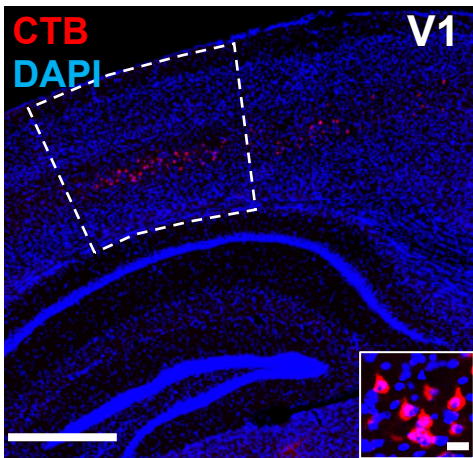

B2

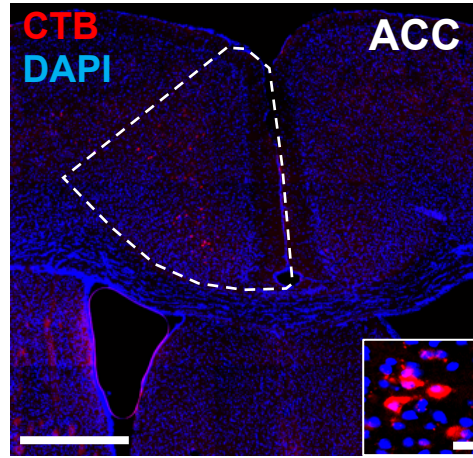

B3

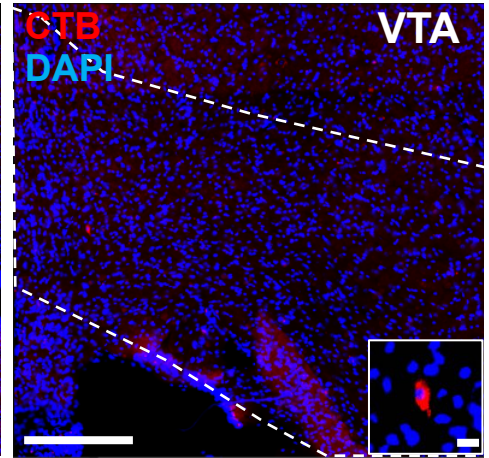

C1

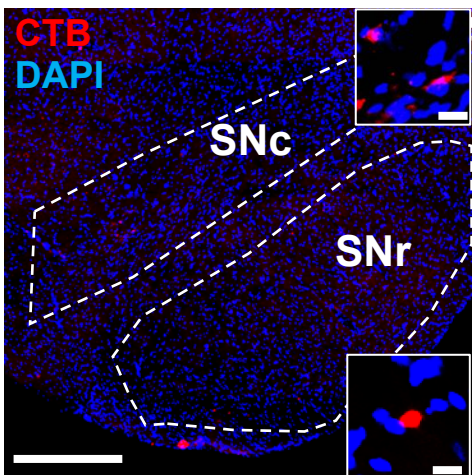

C2

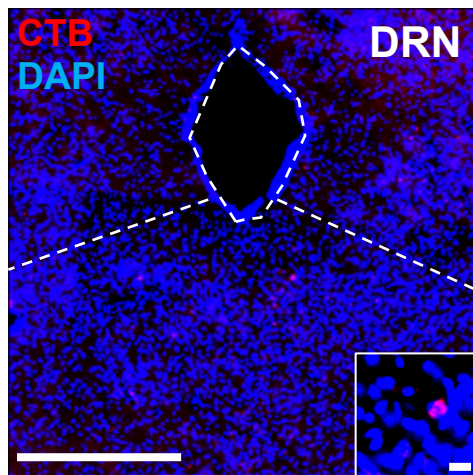

C3

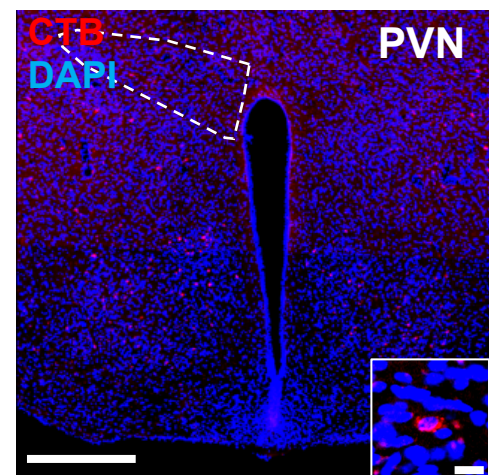

D1

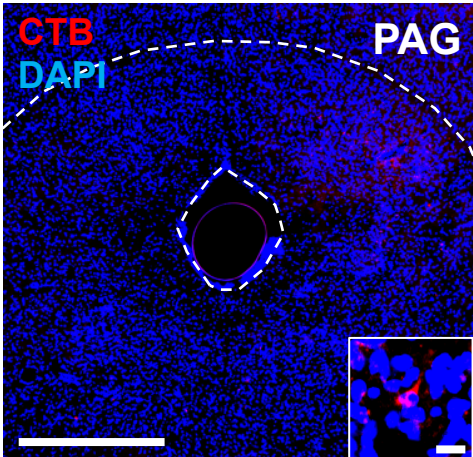

D2

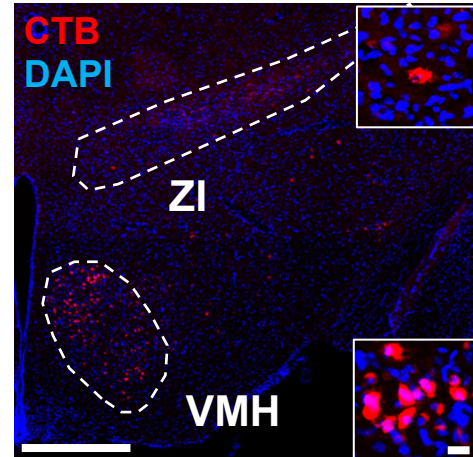

D3

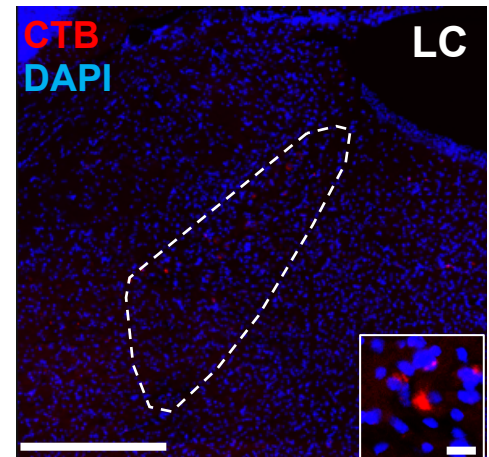



# Sup. Figure 3

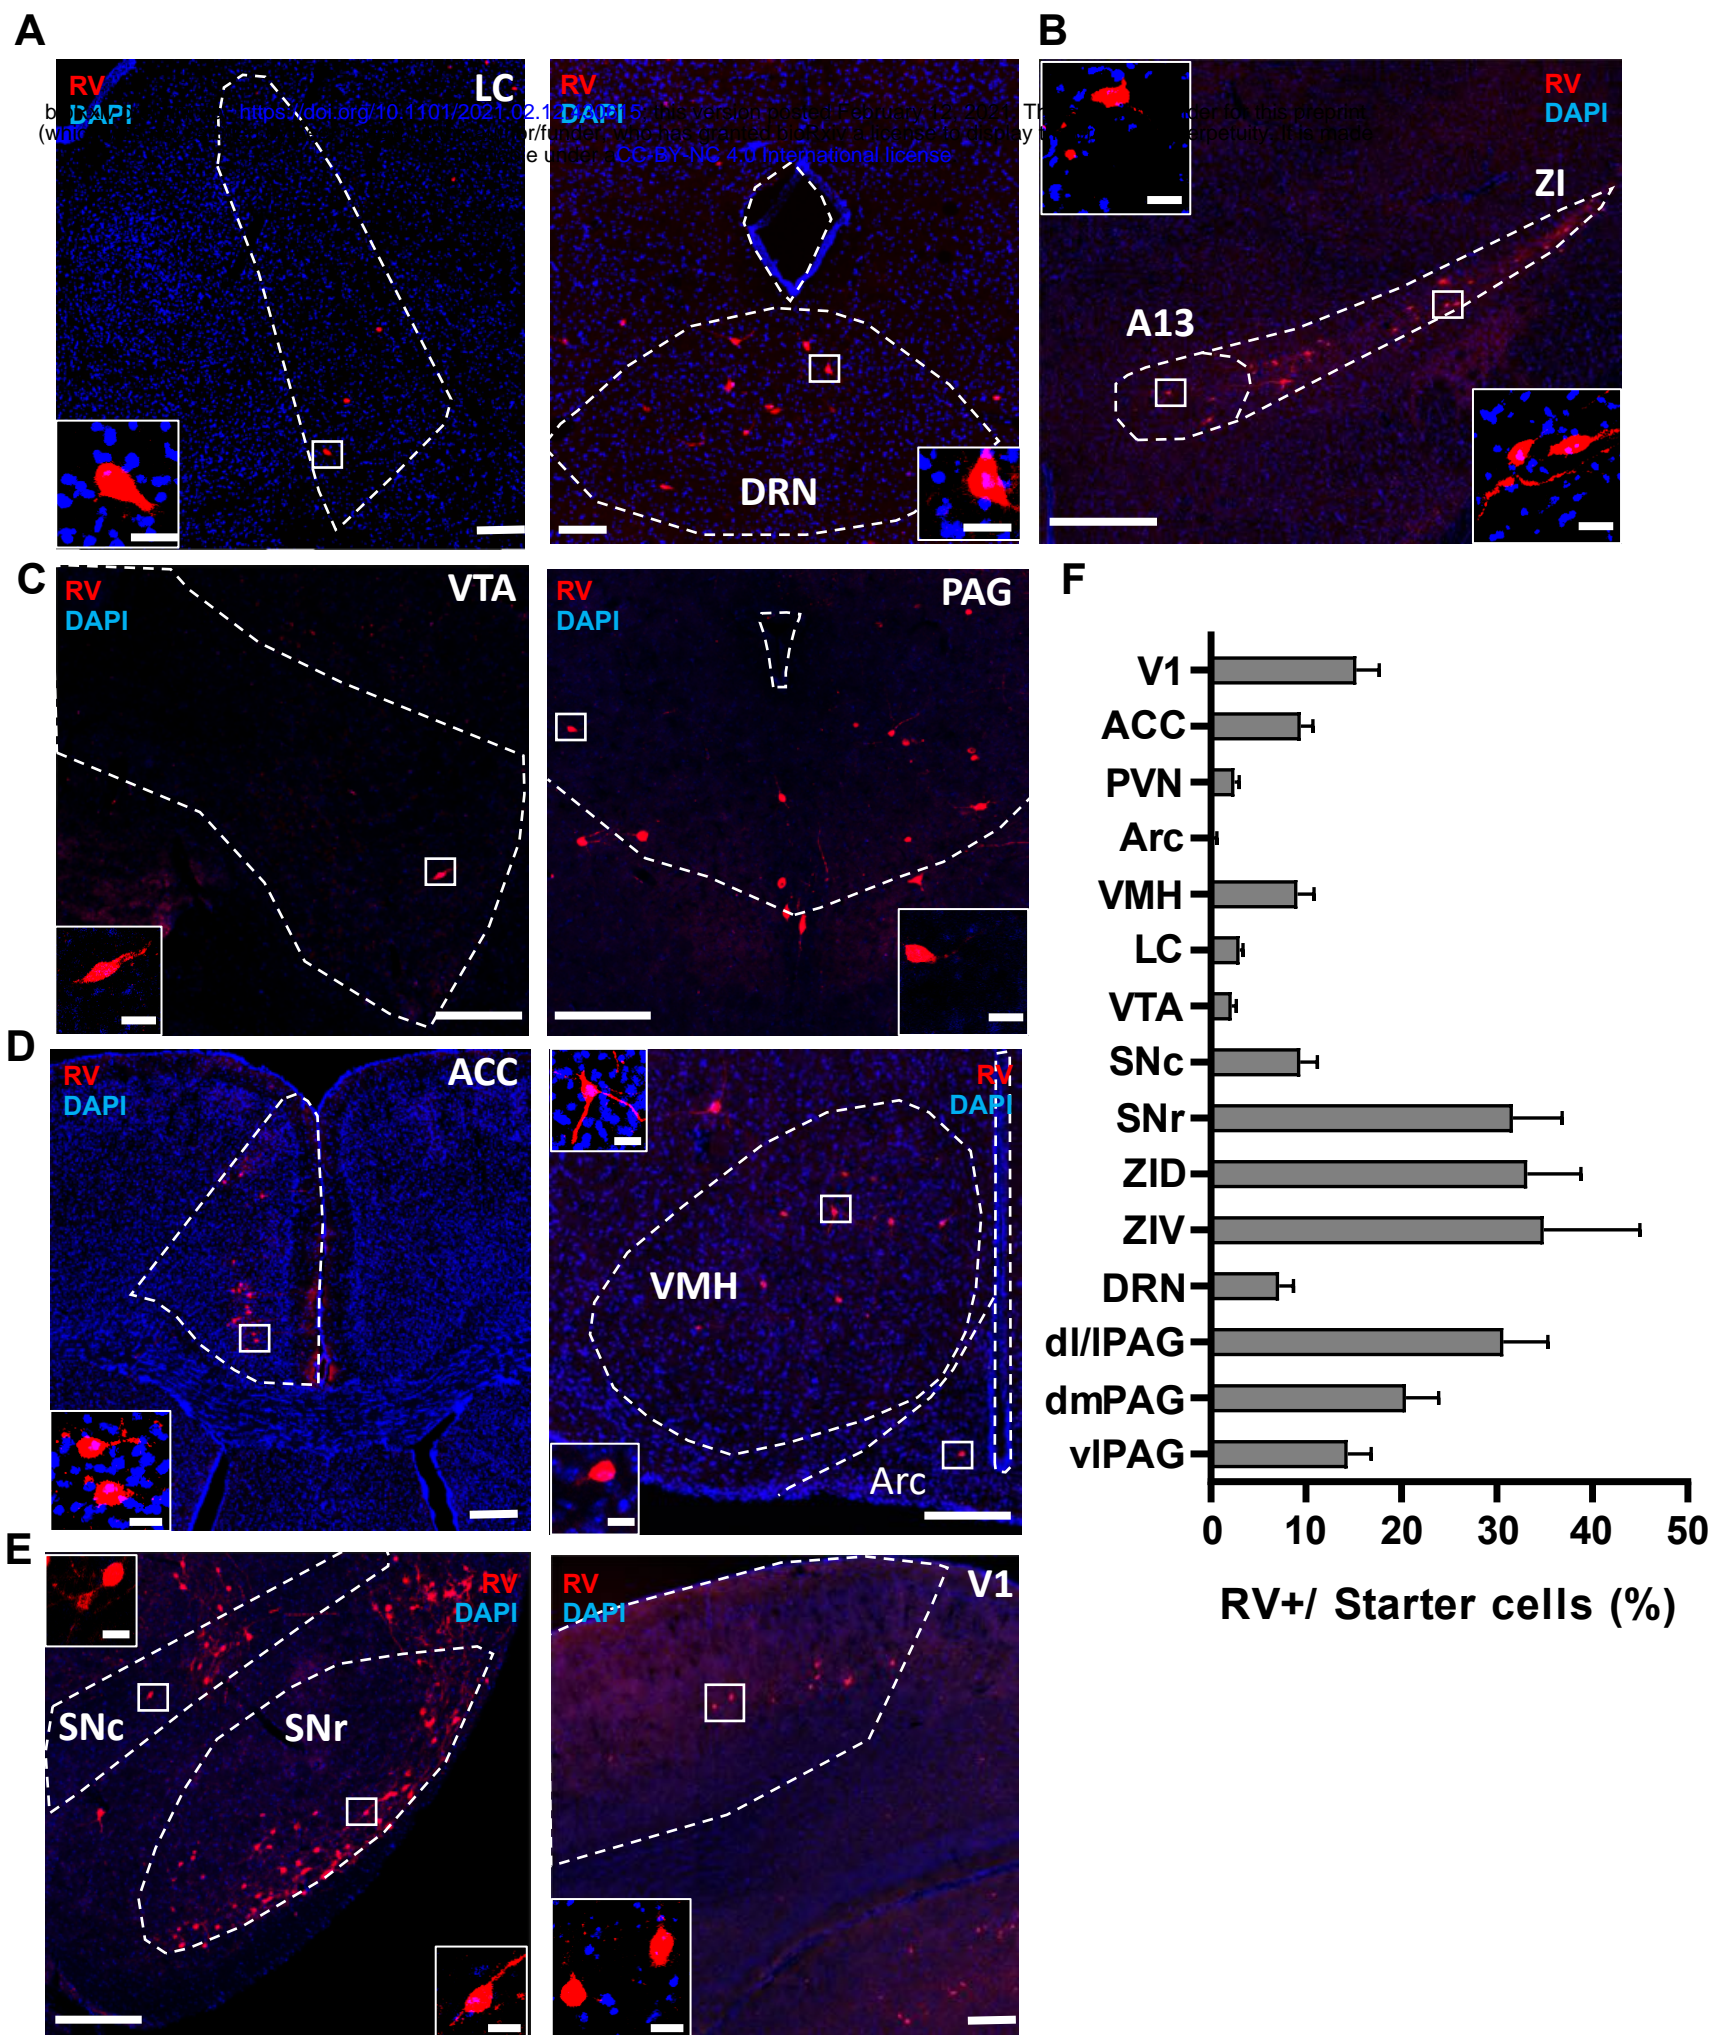

Source: https://biorxiv.org/content/10.1101/2021.02.12.430615v1.full.pdf
